# Supplementary material for: Value of Time to Positivity of Blood Culture in Children with Bloodstream Infections
Source: Hindawi journal article supplement (doi:10.1155/2019/5975837), 2019-01-10
Supplement: f1 [file 5975837.f1.pdf]

| NO. | Gender | Age(year) | Sample | Bacterial | Microorganisms              | MM     | BSI | TTP         | Time period | ESBLs | CRE | MR    | PRSP/PISP |
|-----|--------|-----------|--------|-----------|-----------------------------|--------|-----|-------------|-------------|-------|-----|-------|-----------|
| 1   | m      | 3         | bl     | kpn       | Klebsiella pneumoniae       |        | 1   | 16.85       | 1           | +     | +   |       |           |
| 2   |        |           | bl     | sep       | Staphylococcus epidermidis  | CoNS++ | 0   | 46.58333333 | 2           |       |     | MRCNS |           |
| 3   |        |           | bl     | sho       | Staphylococcus hominis      | CoNS+  | 0   | 18.16666667 | 1           |       |     | MRCNS |           |
| 4   |        |           | bl     | sep       | Staphylococcus epidermidis  | CoNS+  | 0   | 86.35       | 4           |       |     | MSCNS |           |
| 5   |        |           | bl     | sep       | Staphylococcus epidermidis  | CoNS+  | 0   | 60.26666667 | 3           |       |     | MSCNS |           |
| 6   |        |           | bl     | sep       | Staphylococcus epidermidis  | CoNS+  | 0   | 47.78333333 | 2           |       |     | MSCNS |           |
| 7   |        |           | bl     | sho       | Staphylococcus hominis      | CoNS+  | 0   | 46.68333333 | 2           |       |     | MRCNS |           |
| 8   |        |           | bl     | sho       | Staphylococcus hominis      | CoNS+  | 0   | 22.25       | 1           |       |     | MRCNS |           |
| 9   | f      | 1         | bl     | pae       | Pseudomonas aeruginosa      |        | 1   | 23.51666667 | 1           |       |     |       |           |
| 10  |        |           | bl     | sho       | Staphylococcus hominis      | CoNS+  | 0   | 74.73333333 | 4           |       |     | MRCNS |           |
| 11  | m      | 5         | bl     | kpn       | Klebsiella pneumoniae       |        | 1   | 41.03333333 | 2           | -     |     |       |           |
| 12  |        |           | bl     | sep       | Staphylococcus epidermidis  | CoNS+  | 0   | 48.91666667 | 3           |       |     | MRCNS |           |
| 13  |        |           | bl     | sep       | Staphylococcus epidermidis  | CoNS+  | 0   | 71.7        | 3           |       |     | MRCNS |           |
| 14  |        |           | bl     | shl       | Staphylococcus haemolyticus | CoNS+  | 0   | 80.58333333 | 4           |       |     | MRCNS |           |
| 15  |        |           | bl     | sep       | Staphylococcus epidermidis  | CoNS+  | 0   | 39.9        | 2           |       |     | MSCNS |           |
| 16  |        |           | bl     | sho       | Staphylococcus hominis      | CoNS++ | 0   | 35          | 2           |       |     | MSCNS |           |
| 17  | m      | 1         | bl     | efa       | Enterococcus faecalis       |        | 1   | 19.51666667 | 1           |       |     |       |           |
| 18  |        |           | bl     | sep       | Staphylococcus epidermidis  | CoNS+  | 0   | 53.18333333 | 3           |       |     | MRCNS |           |
| 19  |        |           | bl     | sho       | Staphylococcus hominis      | CoNS+  | 0   | 26.76666667 | 2           |       |     | MRCNS |           |
| 20  |        |           | bl     | sho       | Staphylococcus hominis      | CoNS+  | 0   | 27.41666667 | 2           |       |     | MRCNS |           |
| 21  |        |           | bl     | sho       | Staphylococcus hominis      | CoNS+  | 0   | 27.25       | 2           |       |     | MRCNS |           |
| 22  |        |           | bl     | sho       | Staphylococcus hominis      | CoNS+  | 0   | 23.81666667 | 1           |       |     | MRCNS |           |
| 23  |        |           | bl     | sep       | Staphylococcus epidermidis  | CoNS+  | 0   | 47.56666667 | 2           |       |     | MRCNS |           |
| 24  |        |           | bl     | sep       | Staphylococcus epidermidis  | CoNS+  | 0   | 27.16666667 | 2           |       |     | MRCNS |           |
| 25  |        |           | bl     | sho       | Staphylococcus hominis      | CoNS+  | 0   | 34.58333333 | 2           |       |     | MRCNS |           |
| 26  |        |           | bl     | sep       | Staphylococcus epidermidis  | CoNS++ | 0   | 36.26666667 | 2           |       |     | MRCNS |           |
| 27  |        |           | bl     | sho       | Staphylococcus hominis      | CoNS++ | 0   | 46.76666667 | 2           |       |     | MRCNS |           |
| 28  |        |           | bl     | sep       | Staphylococcus epidermidis  | CoNS+  | 0   | 35.53333333 | 2           |       |     | MRCNS |           |
| 29  |        |           | bl     | efa       | Enterococcus faecalis       |        | 0   | 20.25       | 1           |       |     |       |           |
| 30  |        |           | bl     | sep       | Staphylococcus epidermidis  | CoNS+  | 0   | 43.7        | 2           |       |     | MRCNS |           |
| 31  |        |           | bl     | shl       | Staphylococcus haemolyticus | CoNS+  | 0   | 50.3        | 3           |       |     | MRCNS |           |
| 32  |        |           | bl     | sho       | Staphylococcus hominis      | CoNS+  | 0   | 44.41666667 | 2           |       |     | MSCNS |           |
| 33  |        |           | bl     | sep       | Staphylococcus epidermidis  | CoNS+  | 0   | 45.4        | 2           |       |     | MSCNS |           |
| 34  | m      | 13        | bl     | efa       | Enterococcus faecalis       |        | 1   | 16.46666667 | 1           |       |     |       |           |
| 35  |        |           | bl     | sep       | Staphylococcus epidermidis  | CoNS+  | 0   | 34.68333333 | 2           |       |     | MSCNS |           |
| 36  |        |           | bl     | shl       | Staphylococcus haemolyticus | CoNS++ | 0   | 25.78333333 | 2           |       |     | MRCNS |           |
| 37  |        |           | bl     | sho       | Staphylococcus hominis      | CoNS+  | 0   | 33.18333333 | 2           |       |     | MSCNS |           |
| 38  | m      | 4         | bl     | kpn       | Klebsiella pneumoniae       |        | 1   | 22.88333334 | 1           | -     |     |       |           |

|    |   |    |    |     |                             |        |   |             |   |         |  |       |      |
|----|---|----|----|-----|-----------------------------|--------|---|-------------|---|---------|--|-------|------|
| 39 |   |    | bl | sep | Staphylococcus epidermidis  | CoNS+  | 0 | 35.45       | 2 |         |  | MSCNS |      |
| 40 |   |    | bl | sep | Staphylococcus epidermidis  | CoNS+  | 0 | 40.48333333 | 2 |         |  | MSCNS |      |
| 41 |   |    | bl | sho | Staphylococcus hominis      | CoNS+  | 0 | 23.3        | 1 |         |  | MRCNS |      |
| 42 | m | 1  | bl | egg | Enterobacter gergoviae      |        | 1 | 12.98333333 | 1 |         |  |       |      |
| 43 | m | 1  | bl | kpn | Klebsiella pneumoniae       |        | 1 | 17.91666667 | 1 | +       |  |       |      |
| 44 |   |    | bl | sep | Staphylococcus epidermidis  | CoNS++ | 0 | 34.56666667 | 2 |         |  | MRCNS |      |
| 45 | m | 8  | bl | eco | Escherichia coli            |        | 1 | 12.11666667 | 1 | -       |  |       |      |
| 46 |   |    | bl | sep | Staphylococcus epidermidis  | CoNS+  | 0 | 36.78333333 | 2 |         |  | MRCNS |      |
| 47 |   |    | bl | sep | Staphylococcus epidermidis  | CoNS++ | 0 | 31.65       | 2 |         |  | MRCNS |      |
| 48 |   |    | bl | sho | Staphylococcus hominis      | CoNS+  | 0 | 19.66666667 | 1 |         |  | MRCNS |      |
| 49 | m | 13 | bl | kpn | Klebsiella pneumoniae       |        | 1 | 12.98333333 | 1 | +       |  |       |      |
| 50 |   |    | bl | sep | Staphylococcus epidermidis  | CoNS+  | 0 | 39.98333333 | 2 |         |  | MRCNS |      |
| 51 | f | 6  | bl | shl | Staphylococcus haemolyticus | CoNS++ | 1 | 9.916666668 | 1 |         |  | MRCNS |      |
| 52 | f | 2  | bl | sho | Staphylococcus hominis      | CoNS+  | 1 | 37.05       | 2 |         |  | MRCNS |      |
| 53 | m | 2  | bl | spn | Streptococcus Pneumoniae    |        | 1 | 18.65       | 1 |         |  |       | PISP |
| 54 |   |    | bl | stc | Staphylococcus cohnii       | CoNS++ | 0 | 46.03333333 | 2 |         |  | MSCNS |      |
| 55 | m | 12 | bl | kpn | Klebsiella pneumoniae       |        | 1 | 27.06666667 | 2 | +       |  |       |      |
| 56 | f | 1  | bl | eco | Escherichia coli            |        | 1 | 13.31666667 | 1 | +       |  |       |      |
| 57 |   |    | bl | sep | Staphylococcus epidermidis  | CoNS+  | 0 | 33.8        | 2 |         |  | MRCNS |      |
| 58 |   |    | bl | sep | Staphylococcus epidermidis  | CoNS+  | 0 | 47.61666667 | 2 |         |  | MRCNS |      |
| 59 |   |    | bl | shl | Staphylococcus haemolyticus | CoNS+  | 0 | 33.16666667 | 2 |         |  | MRCNS |      |
| 60 | m | 1  | bl | sep | Staphylococcus epidermidis  | CoNS+  | 1 | 19.86666667 | 1 |         |  | MRCNS |      |
| 61 |   |    | bl | sep | Staphylococcus epidermidis  | CoNS++ | 0 | 38.46666667 | 2 |         |  | MRCNS |      |
| 62 | f | 7  | bl | sep | Staphylococcus epidermidis  | CoNS+  | 1 | 54.36666667 | 3 |         |  | MRCNS |      |
| 63 |   |    | bl | sho | Staphylococcus hominis      | CoNS+  | 0 | 31.81666667 | 2 |         |  | MRCNS |      |
| 64 |   |    | bl | sho | Staphylococcus hominis      | CoNS+  | 0 | 37.18333333 | 2 |         |  | MRCNS |      |
| 65 |   |    | bl | sep | Staphylococcus epidermidis  | CoNS+  | 0 | 29.8        | 2 |         |  | MRCNS |      |
| 66 | m | 4  | bl | aba | Acinetobacter baumannii     |        | 1 | 44.66666667 | 2 | NON-XDR |  |       |      |
| 67 |   |    | bl | sep | Staphylococcus epidermidis  | CoNS++ | 0 | 37.93333333 | 2 |         |  | MSCNS |      |
| 68 | f | 13 | bl | sep | Staphylococcus epidermidis  | CoNS+  | 1 | 22.71666667 | 1 |         |  | MRCNS |      |
| 69 |   |    | bl | sep | Staphylococcus epidermidis  | CoNS+  | 0 | 30.31666667 | 2 |         |  | MRCNS |      |
| 70 | m | 3  | bl | sep | Staphylococcus epidermidis  | CoNS++ | 1 | 22.3        | 1 |         |  | MRCNS |      |
| 71 |   |    | bl | shl | Staphylococcus haemolyticus | CoNS+  | 0 | 17.36666667 | 1 |         |  | MRCNS |      |
| 72 | f | 1  | bl | efa | Enterococcus faecalis       |        | 1 | 14.73333333 | 1 |         |  |       |      |
| 73 | f | 2  | bl | eco | Escherichia coli            |        | 1 | 10.31666667 | 1 | +       |  |       |      |
| 74 |   |    | bl | sep | Staphylococcus epidermidis  | CoNS++ | 0 | 45.43333333 | 2 |         |  | MRCNS |      |
| 75 |   |    | bl | sau | Staphylococcus aureus       |        | 0 | 33.31666667 | 2 |         |  | MSSA  |      |
| 76 |   |    | bl | sep | Staphylococcus epidermidis  | CoNS+  | 0 | 32          | 2 |         |  | MSCNS |      |
| 77 |   |    | bl | efa | Enterococcus faecalis       |        | 0 | 20.8        | 1 |         |  |       |      |
| 78 |   |    | bl | ega | Enterococcus gallinarum     |        | 0 | 26.46666666 | 2 |         |  |       |      |

|     |   |   |    |     |                             |        |   |             |   |   |  |       |  |
|-----|---|---|----|-----|-----------------------------|--------|---|-------------|---|---|--|-------|--|
| 79  |   |   | bl | sep | Staphylococcus epidermidis  | CoNS+  | 0 | 44.01666667 | 2 |   |  | MSCNS |  |
| 80  |   |   | bl | sho | Staphylococcus hominis      | CoNS++ | 0 | 21.96666667 | 1 |   |  | MRCNS |  |
| 81  |   |   | bl | efm | Enterococcus faecium        |        | 0 | 32.5        | 2 |   |  |       |  |
| 82  |   |   | bl | ega | Enterococcus gallinarum     |        | 0 | 21.33333333 | 1 |   |  |       |  |
| 83  |   |   | bl | sep | Staphylococcus epidermidis  | CoNS+  | 0 | 48.28333333 | 3 |   |  | MRCNS |  |
| 84  |   |   | bl | sep | Staphylococcus epidermidis  | CoNS+  | 0 | 40.76666667 | 2 |   |  | MRCNS |  |
| 85  |   |   | bl | sho | Staphylococcus hominis      | CoNS+  | 0 | 30.76666667 | 2 |   |  | MRCNS |  |
| 86  |   |   | bl | sep | Staphylococcus epidermidis  | CoNS++ | 0 | 31.41666667 | 2 |   |  | MRCNS |  |
| 87  |   |   | bl | sho | Staphylococcus hominis      | CoNS++ | 0 | 30.91666667 | 2 |   |  | MRCNS |  |
| 88  |   |   | bl | shl | Staphylococcus haemolyticus | CoNS+  | 0 | 27.83333333 | 2 |   |  | MRCNS |  |
| 89  |   |   | bl | sho | Staphylococcus hominis      | CoNS+  | 0 | 45.11666667 | 2 |   |  | MRCNS |  |
| 90  | m | 1 | bl | kpn | Klebsiella pneumoniae       |        | 1 | 8.233333332 | 1 | + |  |       |  |
| 91  |   |   | bl | sho | Staphylococcus hominis      | CoNS++ | 0 | 30.88333333 | 2 |   |  | MRCNS |  |
| 92  |   |   | bl | sho | Staphylococcus hominis      | CoNS+  | 0 | 30.96666667 | 2 |   |  | MSCNS |  |
| 93  | m | 6 | bl | kpn | Klebsiella pneumoniae       |        | 1 | 17.2        | 1 | + |  |       |  |
| 94  |   |   | bl | sep | Staphylococcus epidermidis  | CoNS+  | 0 | 20.95       | 1 |   |  | MSCNS |  |
| 95  |   |   | bl | sep | Staphylococcus epidermidis  | CoNS+  | 0 | 29.13333333 | 2 |   |  | MRCNS |  |
| 96  |   |   | bl | sho | Staphylococcus hominis      | CoNS+  | 0 | 32.86666667 | 2 |   |  | MRCNS |  |
| 97  |   |   | bl | sep | Staphylococcus epidermidis  | CoNS+  | 0 | 32.7        | 2 |   |  | MSCNS |  |
| 98  |   |   | bl | sep | Staphylococcus epidermidis  | CoNS+  | 0 | 41.63333334 | 2 |   |  | MRCNS |  |
| 99  |   |   | bl | shl | Staphylococcus haemolyticus | CoNS+  | 0 | 56          | 3 |   |  | MRCNS |  |
| 100 | m | 4 | bl | sau | Staphylococcus aureus       |        | 1 | 23.28333333 | 1 |   |  | MSSA  |  |
| 101 |   |   | bl | sep | Staphylococcus epidermidis  | CoNS+  | 0 | 51.86666667 | 3 |   |  | MRCNS |  |
| 102 |   |   | bl | sep | Staphylococcus epidermidis  | CoNS+  | 0 | 26.33333333 | 2 |   |  | MRCNS |  |
| 103 | m | 1 | bl | eco | Escherichia coli            |        | 1 | 10.53333333 | 1 | - |  |       |  |
| 104 |   |   | bl | sep | Staphylococcus epidermidis  | CoNS+  | 0 | 45.4        | 2 |   |  | MSCNS |  |
| 105 |   |   | bl | sho | Staphylococcus hominis      | CoNS+  | 0 | 31.41666667 | 2 |   |  | MRCNS |  |
| 106 |   |   | bl | sep | Staphylococcus epidermidis  | CoNS+  | 0 | 48.63333333 | 3 |   |  | MRCNS |  |
| 107 |   |   | bl | shl | Staphylococcus haemolyticus | CoNS+  | 0 | 36.48333333 | 2 |   |  | MRCNS |  |
| 108 |   |   | bl | efa | Enterococcus faecalis       |        | 0 | 23.15       | 1 |   |  |       |  |
| 109 |   |   | bl | sau | Staphylococcus aureus       |        | 0 | 23.15       | 1 |   |  | MRSA  |  |
| 110 |   |   | bl | shl | Staphylococcus haemolyticus | CoNS+  | 0 | 20.05       | 1 |   |  | MRCNS |  |
| 111 |   |   | bl | sho | Staphylococcus hominis      | CoNS+  | 0 | 52.95       | 3 |   |  | MRCNS |  |
| 112 |   |   | bl | sep | Staphylococcus epidermidis  | CoNS+  | 0 | 42.35       | 2 |   |  | MSCNS |  |
| 113 |   |   | bl | sho | Staphylococcus hominis      | CoNS+  | 0 | 16.13333333 | 1 |   |  | MRCNS |  |
| 114 |   |   | bl | sep | Staphylococcus epidermidis  | CoNS+  | 0 | 26.7        | 2 |   |  | MSCNS |  |
| 115 |   |   | bl | sho | Staphylococcus hominis      | CoNS+  | 0 | 27.3        | 2 |   |  | MRCNS |  |
| 116 |   |   | bl | sho | Staphylococcus hominis      | CoNS+  | 0 | 21.85       | 1 |   |  | MRCNS |  |
| 117 |   |   | bl | efa | Enterococcus faecalis       |        | 0 | 17.95       | 1 |   |  |       |  |
| 118 |   |   | bl | sho | Staphylococcus hominis      | CoNS+  | 0 | 32.4        | 2 |   |  | MRCNS |  |

|     |   |   |    |     |                             |        |   |             |   |         |  |       |      |
|-----|---|---|----|-----|-----------------------------|--------|---|-------------|---|---------|--|-------|------|
| 119 |   |   | bl | sho | Staphylococcus hominis      | CoNS+  | 0 | 22.65       | 1 |         |  | MRCNS |      |
| 120 | m | 1 | bl | kpn | Klebsiella pneumoniae       |        | 1 | 8.283333334 | 1 | +       |  |       |      |
| 121 |   |   | bl | pan | Pantoea                     |        | 0 | 25.3        | 2 |         |  |       |      |
| 122 | f | 5 | bl | efm | Enterococcus faecium        |        | 1 | 16.98333333 | 1 |         |  |       |      |
| 123 |   |   | bl | sep | Staphylococcus epidermidis  | CoNS+  | 0 | 36.88333333 | 2 |         |  | MRCNS |      |
| 124 |   |   | bl | sho | Staphylococcus hominis      | CoNS++ | 0 | 43.33333333 | 2 |         |  | MRCNS |      |
| 125 |   |   | bl | stc | Staphylococcus cohnii       | CoNS++ | 0 | 38.88333333 | 2 |         |  | MRCNS |      |
| 126 |   |   | bl | sep | Staphylococcus epidermidis  | CoNS+  | 0 | 23.2        | 1 |         |  | MRCNS |      |
| 127 |   |   | bl | sho | Staphylococcus hominis      | CoNS+  | 0 | 46.06666667 | 2 |         |  | MRCNS |      |
| 128 |   |   | bl | sep | Staphylococcus epidermidis  | CoNS+  | 0 | 26.3        | 2 |         |  | MRCNS |      |
| 129 |   |   | bl | sho | Staphylococcus hominis      | CoNS+  | 0 | 25.68333333 | 2 |         |  | MRCNS |      |
| 130 |   |   | bl | sho | Staphylococcus hominis      | CoNS+  | 0 | 25.56666667 | 2 |         |  | MRCNS |      |
| 131 | f | 1 | bl | sgc | Streptococcus agalactiae    |        | 1 | 16.43333333 | 1 |         |  |       |      |
| 132 |   |   | bl | sho | Staphylococcus hominis      | CoNS+  | 0 | 38.26666667 | 2 |         |  | MRCNS |      |
| 133 |   |   | bl | sep | Staphylococcus epidermidis  | CoNS+  | 0 | 30.83333333 | 2 |         |  | MRCNS |      |
| 134 | m | 4 | bl | shl | Staphylococcus haemolyticus | CoNS+  | 1 | 19.88333333 | 1 |         |  | MRCNS |      |
| 135 |   |   | bl | sit | Staphylococcus intermedius  | CoNS+  | 0 | 27.21666667 | 2 |         |  | MRCNS |      |
| 136 |   |   | bl | sep | Staphylococcus epidermidis  | CoNS+  | 0 | 32.33333333 | 2 |         |  | MRCNS |      |
| 137 | m | 2 | bl | sho | Staphylococcus hominis      | CoNS++ | 1 | 26.71666667 | 2 |         |  | MRCNS |      |
| 138 |   |   | bl | sho | Staphylococcus hominis      | CoNS++ | 0 | 39.3        | 2 |         |  | MRCNS |      |
| 139 |   |   | bl | shl | Staphylococcus haemolyticus | CoNS+  | 0 | 22.83333333 | 1 |         |  | MRCNS |      |
| 140 |   |   | bl | sho | Staphylococcus hominis      | CoNS+  | 0 | 70.4        | 3 |         |  | MRCNS |      |
| 141 |   |   | bl | sep | Staphylococcus epidermidis  | CoNS+  | 0 | 23.5        | 1 |         |  | MRCNS |      |
| 142 |   |   | bl | sep | Staphylococcus epidermidis  | CoNS+  | 0 | 45.86666667 | 2 |         |  | MRCNS |      |
| 143 |   |   | bl | sho | Staphylococcus hominis      | CoNS+  | 0 | 33.35       | 2 |         |  | MSCNS |      |
| 144 |   |   | bl | sho | Staphylococcus hominis      | CoNS+  | 0 | 73.01666667 | 4 |         |  | MRCNS |      |
| 145 | m | 9 | bl | eco | Escherichia coli            |        | 1 | 20.9        | 1 | +       |  |       |      |
| 146 |   |   | bl | sho | Staphylococcus hominis      | CoNS+  | 0 | 34.71666667 | 2 |         |  | MSCNS |      |
| 147 |   |   | bl | sho | Staphylococcus hominis      | CoNS++ | 0 | 37.51666667 | 2 |         |  | MRCNS |      |
| 148 |   |   | bl | sep | Staphylococcus epidermidis  | CoNS+  | 0 | 41.05       | 2 |         |  | MRCNS |      |
| 149 |   |   | bl | sho | Staphylococcus hominis      | CoNS+  | 0 | 28.16666667 | 2 |         |  | MRCNS |      |
| 150 |   |   | bl | sho | Staphylococcus hominis      | CoNS+  | 0 | 32.16666666 | 2 |         |  | MRCNS |      |
| 151 | m | 5 | bl | sho | Staphylococcus hominis      | CoNS+  | 1 | 19.18333333 | 1 |         |  | MSCNS |      |
| 152 | m | 3 | bl | spn | Streptococcus Pneumoniae    |        | 1 | 22.3        | 1 |         |  |       | PSSP |
| 153 |   |   | bl | sho | Staphylococcus hominis      | CoNS+  | 0 | 54.38333333 | 3 |         |  | MRCNS |      |
| 154 | m | 6 | bl | aba | Acinetobacter baumannii     |        | 1 | 18.03333333 | 1 | NON-XDR |  |       |      |
| 155 |   |   | bl | sep | Staphylococcus epidermidis  | CoNS++ | 0 | 40.4        | 2 |         |  | MRCNS |      |
| 156 |   |   | bl | sho | Staphylococcus hominis      | CoNS+  | 0 | 40.46666667 | 2 |         |  | MRCNS |      |
| 157 |   |   | bl | sep | Staphylococcus epidermidis  | CoNS+  | 0 | 35.78333333 | 2 |         |  | MRCNS |      |
| 158 |   |   | bl | mlu | Micrococcus luteus          |        | 0 | 33.63333333 | 2 |         |  |       |      |

|     |   |    |    |     |                             |        |   |             |   |         |   |       |  |
|-----|---|----|----|-----|-----------------------------|--------|---|-------------|---|---------|---|-------|--|
| 159 |   |    | bl | sho | Staphylococcus hominis      | CoNS+  | 0 | 37.23333333 | 2 |         |   | MRCNS |  |
| 160 |   |    | bl | ssi | Staphylococcus simulans     | CoNS+  | 0 | 27.45       | 2 |         |   | MRCNS |  |
| 161 | m | 13 | bl | efa | Enterococcus faecalis       |        | 1 | 15.98333333 | 1 |         |   |       |  |
| 162 |   |    | bl | sep | Staphylococcus epidermidis  | CoNS+  | 0 | 62.3        | 3 |         |   | MRCNS |  |
| 163 |   |    | bl | sep | Staphylococcus epidermidis  | CoNS+  | 0 | 31.46666667 | 2 |         |   | MSCNS |  |
| 164 |   |    | bl | sho | Staphylococcus hominis      | CoNS+  | 0 | 52.93333333 | 3 |         |   | MSCNS |  |
| 165 |   |    | bl | sho | Staphylococcus hominis      | CoNS+  | 0 | 29.13333333 | 2 |         |   | MSCNS |  |
| 166 |   |    | bl | sep | Staphylococcus epidermidis  | CoNS++ | 0 | 39.18333333 | 2 |         |   | MRCNS |  |
| 167 |   |    | bl | shl | Staphylococcus haemolyticus | CoNS+  | 0 | 27.71666667 | 2 |         |   | MRCNS |  |
| 168 |   |    | bl | sho | Staphylococcus hominis      | CoNS++ | 0 | 36.7        | 2 |         |   | MRCNS |  |
| 169 | m | 1  | bl | efa | Enterococcus faecalis       |        | 1 | 8.4         | 1 |         |   |       |  |
| 170 |   |    | bl | sho | Staphylococcus hominis      | CoNS+  | 0 | 44.2        | 2 |         |   | MSCNS |  |
| 171 |   |    | bl | sho | Staphylococcus hominis      | CoNS+  | 0 | 19.43333333 | 1 |         |   | MRCNS |  |
| 172 |   |    | bl | sep | Staphylococcus epidermidis  | CoNS+  | 0 | 63.56666667 | 3 |         |   | MSCNS |  |
| 173 |   |    | bl | shl | Staphylococcus haemolyticus | CoNS+  | 0 | 28.66666667 | 2 |         |   | MRCNS |  |
| 174 |   |    | bl | sep | Staphylococcus epidermidis  | CoNS+  | 0 | 59.5        | 3 |         |   | MRCNS |  |
| 175 |   |    | bl | sep | Staphylococcus epidermidis  | CoNS+  | 0 | 32.16666667 | 2 |         |   | MRCNS |  |
| 176 | f | 13 | bl | efa | Enterococcus faecalis       |        | 1 | 37.35       | 2 |         |   |       |  |
| 177 | f | 1  | bl | efm | Enterococcus faecium        |        | 1 | 30.73333333 | 2 |         |   |       |  |
| 178 |   |    | bl | sep | Staphylococcus epidermidis  | CoNS+  | 0 | 29.9        | 2 |         |   | MRCNS |  |
| 179 | f | 4  | bl | sgc | Streptococcus agalactiae    |        | 1 | 11.45       | 1 |         |   |       |  |
| 180 |   |    | bl | sho | Staphylococcus hominis      | CoNS+  | 0 | 41.5        | 2 |         |   | MSCNS |  |
| 181 |   |    | bl | sho | Staphylococcus hominis      | CoNS+  | 0 | 27.03333333 | 2 |         |   | MSCNS |  |
| 182 |   |    | bl | sho | Staphylococcus hominis      | CoNS++ | 0 | 30.1        | 2 |         |   | MRCNS |  |
| 183 | m | 2  | bl | kpn | Klebsiella pneumoniae       |        | 1 | 12.71666667 | 1 | -       | + |       |  |
| 184 |   |    | bl | sep | Staphylococcus epidermidis  | CoNS+  | 0 | 34.08333333 | 2 |         |   | MSCNS |  |
| 185 |   |    | bl | shl | Staphylococcus haemolyticus | CoNS+  | 0 | 26.66666667 | 2 |         |   | MRCNS |  |
| 186 |   |    | bl | sho | Staphylococcus hominis      | CoNS+  | 0 | 31.45       | 2 |         |   | MRCNS |  |
| 187 |   |    | bl | sep | Staphylococcus epidermidis  | CoNS+  | 0 | 29.06666667 | 2 |         |   | MSCNS |  |
| 188 |   |    | bl | shl | Staphylococcus haemolyticus | CoNS+  | 0 | 45.85       | 2 |         |   | MRCNS |  |
| 189 |   |    | bl | sho | Staphylococcus hominis      | CoNS+  | 0 | 24.86666667 | 2 |         |   | MRCNS |  |
| 190 | f | 7  | bl | sho | Staphylococcus hominis      | CoNS+  | 1 | 19.35       | 1 |         |   | MRCNS |  |
| 191 |   |    | bl | sho | Staphylococcus hominis      | CoNS+  | 0 | 38.53333333 | 2 |         |   | MRCNS |  |
| 192 | f | 4  | bl | aba | Acinetobacter baumannii     |        | 1 | 11.41666667 | 1 | NON-XDR |   |       |  |
| 193 | f | 4  | bl | efa | Enterococcus faecalis       |        | 1 | 11.41666667 | 1 |         |   |       |  |
| 194 |   |    | bl | sho | Staphylococcus hominis      | CoNS+  | 0 | 21.51666667 | 1 |         |   | MRCNS |  |
| 195 | m | 1  | bl | aba | Acinetobacter baumannii     |        | 1 | 11.66666667 | 1 | XDR     |   |       |  |
| 196 |   |    | bl | sau | Staphylococcus aureus       |        | 0 | 24.66666667 | 2 |         |   | MSSA  |  |
| 197 |   |    | bl | sep | Staphylococcus epidermidis  | CoNS++ | 0 | 30.36666667 | 2 |         |   | MRCNS |  |
| 198 |   |    | bl | sep | Staphylococcus epidermidis  | CoNS+  | 0 | 31.75       | 2 |         |   | MSCNS |  |

|     |   |   |    |     |                              |        |   |             |   |   |   |       |  |
|-----|---|---|----|-----|------------------------------|--------|---|-------------|---|---|---|-------|--|
| 199 |   |   | bl | sho | Staphylococcus hominis       | CoNS++ | 0 | 45.06666666 | 2 |   |   | MSCNS |  |
| 200 |   |   | bl | sho | Staphylococcus hominis       | CoNS+  | 0 | 32.15       | 2 |   |   | MRCNS |  |
| 201 |   |   | bl | sho | Staphylococcus hominis       | CoNS+  | 0 | 22.41666667 | 1 |   |   | MRCNS |  |
| 202 |   |   | bl | sep | Staphylococcus epidermidis   | CoNS+  | 0 | 34.55       | 2 |   |   | MRCNS |  |
| 203 |   |   | bl | shl | Staphylococcus haemolyticus  | CoNS++ | 0 | 34.55       | 2 |   |   | MRCNS |  |
| 204 | m | 5 | bl | pma | Stenotrophomonas maltophilia |        | 1 | 27.21666667 | 2 |   |   |       |  |
| 205 |   |   | bl | sep | Staphylococcus epidermidis   | CoNS+  | 0 | 36.56666667 | 2 |   |   | MRCNS |  |
| 206 |   |   | bl | shl | Staphylococcus haemolyticus  | CoNS+  | 0 | 24.26666667 | 2 |   |   | MSCNS |  |
| 207 |   |   | bl | sep | Staphylococcus epidermidis   | CoNS+  | 0 | 41.11666667 | 2 |   |   | MRCNS |  |
| 208 |   |   | bl | sep | Staphylococcus epidermidis   | CoNS+  | 0 | 44.23333333 | 2 |   |   | MRCNS |  |
| 209 |   |   | bl | scp | Staphylococcus caprae        | CoNS+  | 0 | 38.58333333 | 2 |   |   | MSCNS |  |
| 210 |   |   | bl | sho | Staphylococcus hominis       | CoNS+  | 0 | 28.43333334 | 2 |   |   | MRCNS |  |
| 211 | f | 3 | bl | shl | Staphylococcus haemolyticus  | CoNS+  | 1 | 20.15       | 1 |   |   | MRCNS |  |
| 212 | f | 7 | bl | pae | Pseudomonas aeruginosa       |        | 1 | 22.41666666 | 1 |   |   |       |  |
| 213 |   |   | bl | sep | Staphylococcus epidermidis   | CoNS+  | 0 | 37.03333333 | 2 |   |   | MRCNS |  |
| 214 |   |   | bl | shl | Staphylococcus haemolyticus  | CoNS+  | 0 | 30.2        | 2 |   |   | MRCNS |  |
| 215 |   |   | bl | sep | Staphylococcus epidermidis   | CoNS+  | 0 | 39.71666667 | 2 |   |   | MSCNS |  |
| 216 |   |   | bl | shl | Staphylococcus haemolyticus  | CoNS+  | 0 | 37.36666667 | 2 |   |   | MRCNS |  |
| 217 |   |   | bl | sho | Staphylococcus hominis       | CoNS++ | 0 | 30.75       | 2 |   |   | MRCNS |  |
| 218 |   |   | bl | sho | Staphylococcus hominis       | CoNS+  | 0 | 56.9        | 3 |   |   | MRCNS |  |
| 219 |   |   | bl | efa | Enterococcus faecalis        |        | 0 | 36.61666667 | 2 |   |   |       |  |
| 220 | m | 1 | bl | kpn | Klebsiella pneumoniae        |        | 1 | 21.91666667 | 1 | - | + |       |  |
| 221 |   |   | bl | sep | Staphylococcus epidermidis   | CoNS+  | 0 | 21.35       | 1 |   |   | MRCNS |  |
| 222 |   |   | bl | sep | Staphylococcus epidermidis   | CoNS+  | 0 | 44.16666666 | 2 |   |   | MRCNS |  |
| 223 |   |   | bl | sho | Staphylococcus hominis       | CoNS+  | 0 | 31.88333333 | 2 |   |   | MRCNS |  |
| 224 |   |   | bl | sep | Staphylococcus epidermidis   | CoNS++ | 0 | 24.75       | 2 |   |   | MRCNS |  |
| 225 |   |   | bl | sho | Staphylococcus hominis       | CoNS++ | 0 | 50.28333333 | 3 |   |   | MRCNS |  |
| 226 |   |   | bl | sho | Staphylococcus hominis       | CoNS+  | 0 | 72.66666666 | 4 |   |   | MSCNS |  |
| 227 |   |   | bl | sep | Staphylococcus epidermidis   | CoNS+  | 0 | 64.46666667 | 3 |   |   | MRCNS |  |
| 228 |   |   | bl | sep | Staphylococcus epidermidis   | CoNS+  | 0 | 26.9        | 2 |   |   | MRCNS |  |
| 229 |   |   | bl | sep | Staphylococcus epidermidis   | CoNS+  | 0 | 26.35       | 2 |   |   | MRCNS |  |
| 230 | m | 1 | bl | ecl | Enterobacter cloacae         |        | 1 | 20.15       | 1 |   | + |       |  |
| 231 |   |   | bl | efa | Enterococcus faecalis        |        | 0 | 10.25       | 1 |   |   |       |  |
| 232 |   |   | bl | sep | Staphylococcus epidermidis   | CoNS++ | 0 | 19.63333333 | 1 |   |   | MRCNS |  |
| 233 |   |   | bl | sho | Staphylococcus hominis       | CoNS+  | 0 | 37.75       | 2 |   |   | MRCNS |  |
| 234 |   |   | bl | sho | Staphylococcus hominis       | CoNS+  | 0 | 27.5        | 2 |   |   | MRCNS |  |
| 235 |   |   | bl | efa | Enterococcus faecalis        |        | 0 | 13.13333333 | 1 |   |   |       |  |
| 236 |   |   | bl | sep | Staphylococcus epidermidis   | CoNS+  | 0 | 51.38333333 | 3 |   |   | MRCNS |  |
| 237 |   |   | bl | sep | Staphylococcus epidermidis   | CoNS+  | 0 | 25.73333333 | 2 |   |   | MSCNS |  |
| 238 |   |   | bl | sep | Staphylococcus epidermidis   | CoNS+  | 0 | 36.66666667 | 2 |   |   | MRCNS |  |

|     |   |   |    |     |                             |        |   |             |   |   |   |       |  |
|-----|---|---|----|-----|-----------------------------|--------|---|-------------|---|---|---|-------|--|
| 239 | m | 3 | bl | sep | Staphylococcus epidermidis  | CoNS+  | 1 | 13.68333333 | 1 |   |   | MRCNS |  |
| 240 |   |   | bl | sho | Staphylococcus hominis      | CoNS+  | 0 | 30          | 2 |   |   | MRCNS |  |
| 241 |   |   | bl | sep | Staphylococcus epidermidis  | CoNS+  | 0 | 70.18333333 | 3 |   |   | MRCNS |  |
| 242 |   |   | bl | sho | Staphylococcus hominis      | CoNS+  | 0 | 58.45       | 3 |   |   | MRCNS |  |
| 243 |   |   | bl | sho | Staphylococcus hominis      | CoNS+  | 0 | 75.01666667 | 4 |   |   | MRCNS |  |
| 244 |   |   | bl | shl | Staphylococcus haemolyticus | CoNS+  | 0 | 32.23333333 | 2 |   |   | MRCNS |  |
| 245 |   |   | bl | sho | Staphylococcus hominis      | CoNS+  | 0 | 62.58333333 | 3 |   |   | MRCNS |  |
| 246 | f | 1 | bl | kox | Klebsiella oxytoca          |        | 1 | 18.31666667 | 1 | - |   |       |  |
| 247 | f | 1 | bl | kpn | Klebsiella pneumoniae       |        | 1 | 60.23333333 | 3 | + |   |       |  |
| 248 |   |   | bl | sho | Staphylococcus hominis      | CoNS+  | 0 | 29.68333333 | 2 |   |   | MSCNS |  |
| 249 | m | 8 | bl | kpn | Klebsiella pneumoniae       |        | 1 | 16.1        | 1 | - |   |       |  |
| 250 | m | 4 | bl | kpn | Klebsiella pneumoniae       |        | 1 | 17.95       | 1 | - |   |       |  |
| 251 | f | 6 | bl | kpn | Klebsiella pneumoniae       |        | 1 | 12.01666667 | 1 | - | + |       |  |
| 252 |   |   | bl | sau | Staphylococcus aureus       |        | 0 | 30.9        | 2 |   |   | MSSA  |  |
| 253 |   |   | bl | sep | Staphylococcus epidermidis  | CoNS++ | 0 | 32.91666666 | 2 |   |   | MRCNS |  |
| 254 |   |   | bl | sep | Staphylococcus epidermidis  | CoNS++ | 0 | 41.93333333 | 2 |   |   | MSCNS |  |
| 255 |   |   | bl | shl | Staphylococcus haemolyticus | CoNS+  | 0 | 24.41666667 | 2 |   |   | MRCNS |  |
| 256 |   |   | bl | sho | Staphylococcus hominis      | CoNS++ | 0 | 32.75       | 2 |   |   | MRCNS |  |
| 257 |   |   | bl | sho | Staphylococcus hominis      | CoNS++ | 0 | 28.61666667 | 2 |   |   | MSCNS |  |
| 258 |   |   | bl | sho | Staphylococcus hominis      | CoNS+  | 0 | 44.88333333 | 2 |   |   | MRCNS |  |
| 259 |   |   | bl | sho | Staphylococcus hominis      | CoNS+  | 0 | 29.3        | 2 |   |   | MRCNS |  |
| 260 |   |   | bl | sho | Staphylococcus hominis      | CoNS+  | 0 | 27.95       | 2 |   |   | MRCNS |  |
| 261 | m | 1 | bl | kpn | Klebsiella pneumoniae       |        | 1 | 7.766666666 | 1 | + | + |       |  |
| 262 |   |   | bl | sep | Staphylococcus epidermidis  | CoNS+  | 0 | 23.85       | 1 |   |   | MRCNS |  |
| 263 |   |   | bl | sho | Staphylococcus hominis      | CoNS+  | 0 | 24.23333333 | 2 |   |   | MRCNS |  |
| 264 |   |   | bl | sho | Staphylococcus hominis      | CoNS+  | 0 | 53.63333333 | 3 |   |   | MRCNS |  |
| 265 |   |   | bl | shl | Staphylococcus haemolyticus | CoNS+  | 0 | 38.66666667 | 2 |   |   | MSCNS |  |
| 266 | m | 4 | bl | eco | Escherichia coli            |        | 1 | 38.66666667 | 2 | - |   |       |  |
| 267 |   |   | bl | sau | Staphylococcus aureus       |        | 0 | 21.28333333 | 1 |   |   | MSSA  |  |
| 268 |   |   | bl | sau | Staphylococcus aureus       |        | 0 | 35.1        | 2 |   |   | MRSA  |  |
| 269 |   |   | bl | efa | Enterococcus faecalis       |        | 0 | 24.9        | 2 |   |   |       |  |
| 270 |   |   | bl | efa | Enterococcus faecalis       |        | 0 | 18.6        | 1 |   |   |       |  |
| 271 | m | 1 | bl | kpn | Klebsiella pneumoniae       |        | 1 | 18.6        | 1 | - | + |       |  |
| 272 |   |   | bl | sep | Staphylococcus epidermidis  | CoNS+  | 0 | 42.51666667 | 2 |   |   | MRCNS |  |
| 273 | f | 1 | bl | eco | Escherichia coli            |        | 1 | 10.61666667 | 1 | + |   |       |  |
| 274 |   |   | bl | sho | Staphylococcus hominis      | CoNS+  | 0 | 28.11666667 | 2 |   |   | MRCNS |  |
| 275 |   |   | bl | atu | Rhizobium radiobacter       |        | 0 | 29.21666667 | 2 |   |   |       |  |
| 276 | m | 3 | bl | sep | Staphylococcus epidermidis  | CoNS+  | 1 | 20.91666667 | 1 |   |   | MRCNS |  |
| 277 |   |   | bl | sep | Staphylococcus epidermidis  | CoNS+  | 0 | 30.06666667 | 2 |   |   | MSCNS |  |
| 278 |   |   | bl | sle | Staphylococcus sciuri       | CoNS+  | 0 | 22.03333333 | 1 |   |   | MRCNS |  |

|     |   |    |    |     |                              |        |   |             |   |   |  |       |  |
|-----|---|----|----|-----|------------------------------|--------|---|-------------|---|---|--|-------|--|
| 279 |   |    | bl | sep | Staphylococcus epidermidis   | CoNS+  | 0 | 48.11666667 | 3 |   |  | MRCNS |  |
| 280 |   |    | bl | efm | Enterococcus faecium         |        | 0 | 35.58333333 | 2 |   |  |       |  |
| 281 |   |    | bl | pps | Staphylococcus saprophyticus | CoNS+  | 0 | 57.91666667 | 3 |   |  | MRCNS |  |
| 282 |   |    | bl | sep | Staphylococcus epidermidis   | CoNS++ | 0 | 56.31666667 | 3 |   |  | MRCNS |  |
| 283 |   |    | bl | sho | Staphylococcus hominis       | CoNS+  | 0 | 27.26666667 | 2 |   |  | MRCNS |  |
| 284 | f | 1  | bl | sho | Staphylococcus hominis       | CoNS+  | 1 | 19.88333333 | 1 |   |  | MRCNS |  |
| 285 |   |    | bl | sho | Staphylococcus hominis       | CoNS+  | 0 | 40.6        | 2 |   |  | MRCNS |  |
| 286 |   |    | bl | sho | Staphylococcus hominis       | CoNS+  | 0 | 26.38333333 | 2 |   |  | MRCNS |  |
| 287 |   |    | bl | sep | Staphylococcus epidermidis   | CoNS++ | 0 | 27.05       | 2 |   |  | MRCNS |  |
| 288 |   |    | bl | sho | Staphylococcus hominis       | CoNS+  | 0 | 25.6        | 2 |   |  | MRCNS |  |
| 289 |   |    | bl | sho | Staphylococcus hominis       | CoNS+  | 0 | 68.68333333 | 3 |   |  | MSCNS |  |
| 290 | m | 4  | bl | eco | Escherichia coli             |        | 1 | 33.85       | 2 | + |  |       |  |
| 291 |   |    | bl | sep | Staphylococcus epidermidis   | CoNS+  | 0 | 80.06666667 | 4 |   |  | MRCNS |  |
| 292 |   |    | bl | shl | Staphylococcus haemolyticus  | CoNS+  | 0 | 63.18333333 | 3 |   |  | MRCNS |  |
| 293 |   |    | bl | sep | Staphylococcus epidermidis   | CoNS++ | 0 | 35.45       | 2 |   |  | MRCNS |  |
| 294 | f | 5  | bl | sgc | Streptococcus agalactiae     |        | 1 | 11.33333333 | 1 |   |  |       |  |
| 295 |   |    | bl | sho | Staphylococcus hominis       | CoNS+  | 0 | 22.2        | 1 |   |  | MRCNS |  |
| 296 |   |    | bl | sho | Staphylococcus hominis       | CoNS+  | 0 | 44.06666667 | 2 |   |  | MRCNS |  |
| 297 | m | 5  | bl | ssr | Staphylococcus sciuri        | CoNS+  | 1 | 20.38333333 | 1 |   |  | MRCNS |  |
| 298 | f | 3  | bl | eco | Escherichia coli             |        | 1 | 9.433333334 | 1 | - |  |       |  |
| 299 |   |    | bl | sau | Staphylococcus aureus        |        | 0 | 20.38333333 | 1 |   |  | MSSA  |  |
| 300 |   |    | bl | sep | Staphylococcus epidermidis   | CoNS+  | 0 | 31.53333333 | 2 |   |  | MRCNS |  |
| 301 |   |    | bl | efm | Enterococcus faecium         |        | 0 | 26.15       | 2 |   |  |       |  |
| 302 | m | 1  | bl | kpn | Klebsiella pneumoniae        |        | 1 | 13.2        | 1 | + |  |       |  |
| 303 |   |    | bl | sep | Staphylococcus epidermidis   | CoNS++ | 0 | 43.11666667 | 2 |   |  | MRCNS |  |
| 304 |   |    | bl | sep | Staphylococcus epidermidis   | CoNS+  | 0 | 28.78333333 | 2 |   |  | MRCNS |  |
| 305 | f | 1  | bl | sep | Staphylococcus epidermidis   | CoNS++ | 1 | 27.66666667 | 2 |   |  | MRCNS |  |
| 306 | f | 1  | bl | shl | Staphylococcus haemolyticus  | CoNS++ | 1 | 14.31666667 | 1 |   |  | MRCNS |  |
| 307 | f | 2  | bl | kpn | Klebsiella pneumoniae        |        | 1 | 15.08333333 | 1 | + |  |       |  |
| 308 |   |    | bl | sep | Staphylococcus epidermidis   | CoNS+  | 0 | 30.68333333 | 2 |   |  | MRCNS |  |
| 309 |   |    | bl | sep | Staphylococcus epidermidis   | CoNS+  | 0 | 20.35       | 1 |   |  | MSCNS |  |
| 310 |   |    | bl | sep | Staphylococcus epidermidis   | CoNS+  | 0 | 37.03333333 | 2 |   |  | MRCNS |  |
| 311 |   |    | bl | sep | Staphylococcus epidermidis   | CoNS+  | 0 | 53.63333333 | 3 |   |  | MRCNS |  |
| 312 |   |    | bl | sep | Staphylococcus epidermidis   | CoNS+  | 0 | 35.83333333 | 2 |   |  | MRCNS |  |
| 313 | f | 1  | bl | eco | Escherichia coli             |        | 1 | 9.250000001 | 1 | + |  |       |  |
| 314 |   |    | bl | sep | Staphylococcus epidermidis   | CoNS+  | 0 | 31.25       | 2 |   |  | MSCNS |  |
| 315 |   |    | bl | sho | Staphylococcus hominis       | CoNS+  | 0 | 31.45       | 2 |   |  | MRCNS |  |
| 316 |   |    | bl | sho | Staphylococcus hominis       | CoNS+  | 0 | 43.18333333 | 2 |   |  | MRCNS |  |
| 317 |   |    | bl | swa | Staphylococcus warneri       | CoNS+  | 0 | 39.63333333 | 2 |   |  | MSCNS |  |
| 318 | f | 12 | bl | eco | Escherichia coli             |        | 1 | 16.63333333 | 1 | + |  |       |  |



|     |   |   |    |     |                            |        |   |             |   |         |  |       |  |
|-----|---|---|----|-----|----------------------------|--------|---|-------------|---|---------|--|-------|--|
| 319 |   |   | bl | efm | Enterococcus faecium       |        | 0 | 24.1        | 2 |         |  |       |  |
| 320 | f | 7 | bl | kpn | Klebsiella pneumoniae      |        | 1 | 21.78333333 | 1 | -       |  |       |  |
| 321 |   |   | bl | sho | Staphylococcus hominis     | CoNS++ | 0 | 38.31666667 | 2 |         |  | MRCNS |  |
| 322 | m | 1 | bl | eco | Escherichia coli           |        | 1 | 22.76666667 | 1 | -       |  |       |  |
| 323 |   |   | bl | sep | Staphylococcus epidermidis | CoNS+  | 0 | 34.16666667 | 2 |         |  | MRCNS |  |
| 324 | m | 3 | bl | aba | Acinetobacter baumannii    |        | 1 | 17.75       | 1 | NON-XDR |  |       |  |
| 325 | m | 1 | bl | kpn | Klebsiella pneumoniae      |        | 1 | 14.66666667 | 1 | -       |  |       |  |
| 326 |   |   | bl | scp | Staphylococcus caprae      | CoNS+  | 0 | 24.01666667 | 2 |         |  | MSCNS |  |
| 327 |   |   | bl | sep | Staphylococcus epidermidis | CoNS+  | 0 | 35.51666667 | 2 |         |  | MRCNS |  |
| 328 | f | 1 | bl | aba | Acinetobacter baumannii    |        | 1 | 9.483333331 | 1 | XDR     |  |       |  |
| 329 | f | 1 | bl | efm | Enterococcus faecium       |        | 1 | 24.35       | 2 |         |  |       |  |
| 330 |   |   | bl | sep | Staphylococcus epidermidis | CoNS++ | 0 | 33.2        | 2 |         |  | MRCNS |  |
| 331 |   |   | bl | sep | Staphylococcus epidermidis | CoNS++ | 0 | 41.48333333 | 2 |         |  | MRCNS |  |
| 332 | f | 4 | bl | efa | Enterococcus faecalis      |        | 1 | 13.68333333 | 1 |         |  |       |  |
| 333 |   |   | bl | sep | Staphylococcus epidermidis | CoNS+  | 0 | 35.65       | 2 |         |  | MRCNS |  |
| 334 |   |   | bl | sep | Staphylococcus epidermidis | CoNS+  | 0 | 35.06666667 | 2 |         |  | MRCNS |  |
| 335 |   |   | bl | sho | Staphylococcus hominis     | CoNS+  | 0 | 39.13333333 | 2 |         |  | MRCNS |  |
| 336 | f | 3 | bl | eco | Escherichia coli           |        | 1 | 17.06666667 | 1 | +       |  |       |  |
| 337 | f | 2 | bl | sen | Salmonella                 |        | 1 | 16.21666667 | 1 |         |  |       |  |
| 338 |   |   | bl | sep | Staphylococcus epidermidis | CoNS++ | 0 | 35.83333333 | 2 |         |  | MRCNS |  |
| 339 | m | 1 | bl | sgc | Streptococcus agalactiae   |        | 1 | 6.883333332 | 1 |         |  |       |  |
| 340 | f | 1 | bl | sau | Staphylococcus aureus      |        | 1 | 25.26666667 | 2 |         |  | MRSA  |  |
| 341 |   |   | bl | sep | Staphylococcus epidermidis | CoNS+  | 0 | 54.36666667 | 3 |         |  | MRCNS |  |
| 342 | f | 1 | bl | kpn | Klebsiella pneumoniae      |        | 1 | 7.283333333 | 1 | +       |  |       |  |
| 343 |   |   | bl | sep | Staphylococcus epidermidis | CoNS+  | 0 | 36.65       | 2 |         |  | MRCNS |  |
| 344 |   |   | bl | sep | Staphylococcus epidermidis | CoNS++ | 0 | 50.95       | 3 |         |  | MSCNS |  |
| 345 |   |   | bl | sho | Staphylococcus hominis     | CoNS+  | 0 | 26.71666667 | 2 |         |  | MSCNS |  |
| 346 |   |   | bl | sho | Staphylococcus hominis     | CoNS+  | 0 | 25.5        | 2 |         |  | MRCNS |  |
| 347 | m | 2 | bl | sho | Staphylococcus hominis     | CoNS+  | 1 | 14.61666666 | 1 |         |  | MRCNS |  |
| 348 | f | 2 | bl | sgc | Streptococcus agalactiae   |        | 1 | 7.333333332 | 1 |         |  |       |  |
| 349 |   |   | bl | sho | Staphylococcus hominis     | CoNS+  | 0 | 27.1        | 2 |         |  | MRCNS |  |
| 350 |   |   | bl | sho | Staphylococcus hominis     | CoNS+  | 0 | 35.65       | 2 |         |  | MRCNS |  |
| 351 | f | 1 | bl | eco | Escherichia coli           |        | 1 | 9.683333335 | 1 | +       |  |       |  |
| 352 |   |   | bl | sho | Staphylococcus hominis     | CoNS+  | 0 | 35.45       | 2 |         |  | MRCNS |  |
| 353 |   |   | bl | sho | Staphylococcus hominis     | CoNS+  | 0 | 47.63333333 | 2 |         |  | MRCNS |  |
| 354 |   |   | bl | efm | Enterococcus faecium       |        | 0 | 22.86666667 | 1 |         |  |       |  |
| 355 |   |   | bl | sca | Staphylococcus capitis     | CoNS+  | 0 | 49.98333333 | 3 |         |  | MRCNS |  |
| 356 |   |   | bl | sep | Staphylococcus epidermidis | CoNS+  | 0 | 24.55       | 2 |         |  | MRCNS |  |
| 357 |   |   | bl | sho | Staphylococcus hominis     | CoNS+  | 0 | 29.65       | 2 |         |  | MRCNS |  |
| 358 | f | 1 | bl | kpn | Klebsiella pneumoniae      |        | 1 | 11.3        | 1 | +       |  |       |  |

|     |   |   |    |     |                              |        |   |             |   |   |   |       |  |
|-----|---|---|----|-----|------------------------------|--------|---|-------------|---|---|---|-------|--|
| 359 | f | 4 | bl | sau | Staphylococcus aureus        |        | 1 | 14.1        | 1 |   |   | MSSA  |  |
| 360 |   |   | bl | sep | Staphylococcus epidermidis   | CoNS+  | 0 | 30.86666667 | 2 |   |   | MSCNS |  |
| 361 |   |   | bl | sho | Staphylococcus hominis       | CoNS+  | 0 | 28.91666667 | 2 |   |   | MRCNS |  |
| 362 |   |   | bl | sho | Staphylococcus hominis       | CoNS+  | 0 | 51.4        | 3 |   |   | MRCNS |  |
| 363 | f | 1 | bl | efa | Enterococcus faecalis        |        | 1 | 10.45       | 1 |   |   |       |  |
| 364 |   |   | bl | sep | Staphylococcus epidermidis   | CoNS++ | 0 | 36.95       | 2 |   |   | MRCNS |  |
| 365 |   |   | bl | sho | Staphylococcus hominis       | CoNS+  | 0 | 26.15       | 2 |   |   | MRCNS |  |
| 366 |   |   | bl | sho | Staphylococcus hominis       | CoNS+  | 0 | 28.58333333 | 2 |   |   | MRCNS |  |
| 367 |   |   | bl | sep | Staphylococcus epidermidis   | CoNS+  | 0 | 30.11666667 | 2 |   |   | MRCNS |  |
| 368 |   |   | bl | sep | Staphylococcus epidermidis   | CoNS+  | 0 | 34.1        | 2 |   |   | MRCNS |  |
| 369 |   |   | bl | shl | Staphylococcus haemolyticus  | CoNS+  | 0 | 43.3        | 2 |   |   | MRCNS |  |
| 370 |   |   | bl | sho | Staphylococcus hominis       | CoNS+  | 0 | 24.31666667 | 2 |   |   | MRCNS |  |
| 371 |   |   | bl | efm | Enterococcus faecium         |        | 0 | 34.35       | 2 |   |   |       |  |
| 372 | m | 1 | bl | efm | Enterococcus faecium         |        | 1 | 27.05       | 2 |   |   |       |  |
| 373 |   |   | bl | sep | Staphylococcus epidermidis   | CoNS+  | 0 | 53.03333334 | 3 |   |   | MRCNS |  |
| 374 |   |   | bl | sep | Staphylococcus epidermidis   | CoNS+  | 0 | 53.01666667 | 3 |   |   | MRCNS |  |
| 375 | m | 1 | bl | sep | Staphylococcus epidermidis   | CoNS+  | 1 | 15.2        | 1 |   |   | MRCNS |  |
| 376 | f | 2 | bl | kpn | Klebsiella pneumoniae        |        | 1 | 4.416666665 | 1 | + | + |       |  |
| 377 | m | 1 | bl | sep | Staphylococcus epidermidis   | CoNS+  | 1 | 19.05       | 1 |   |   | MRCNS |  |
| 378 |   |   | bl | shl | Staphylococcus haemolyticus  | CoNS+  | 0 | 56.45       | 3 |   |   | MSCNS |  |
| 379 |   |   | bl | sho | Staphylococcus hominis       | CoNS+  | 0 | 26.7        | 2 |   |   | MRCNS |  |
| 380 | m | 1 | bl | sit | Staphylococcus intermedius   | CoNS+  | 1 | 21.86666667 | 1 |   |   | MSCNS |  |
| 381 |   |   | bl | sep | Staphylococcus epidermidis   | CoNS++ | 0 | 29.26666667 | 2 |   |   | MRCNS |  |
| 382 |   |   | bl | sep | Staphylococcus epidermidis   | CoNS+  | 0 | 29.98333333 | 2 |   |   | MRCNS |  |
| 383 | f | 1 | bl | kpn | Klebsiella pneumoniae        |        | 1 | 3.233333335 | 1 | + |   |       |  |
| 384 | m | 1 | bl | kpn | Klebsiella pneumoniae        |        | 1 | 9.233333335 | 1 | + |   |       |  |
| 385 | f | 1 | bl | kpn | Klebsiella pneumoniae        |        | 1 | 10.98333333 | 1 | + |   |       |  |
| 386 |   |   | bl | sep | Staphylococcus epidermidis   | CoNS+  | 0 | 36.71666667 | 2 |   |   | MRCNS |  |
| 387 |   |   | bl | sho | Staphylococcus hominis       | CoNS+  | 0 | 52.05       | 3 |   |   | MRCNS |  |
| 388 | m | 1 | bl | kpn | Klebsiella pneumoniae        |        | 1 | 18.58333333 | 1 | + |   |       |  |
| 389 | f | 1 | bl | kpn | Klebsiella pneumoniae        |        | 1 | 18.6        | 1 | + | + |       |  |
| 390 | f | 1 | bl | kpn | Klebsiella pneumoniae        |        | 1 | 20.13333333 | 1 | + |   |       |  |
| 391 | m | 1 | bl | kpn | Klebsiella pneumoniae        |        | 1 | 21.75       | 1 | + | + |       |  |
| 392 |   |   | bl | pps | Staphylococcus saprophyticus | CoNS+  | 0 | 25.13333333 | 2 |   |   | MRCNS |  |
| 393 | m | 2 | bl | sep | Staphylococcus epidermidis   | CoNS+  | 1 | 20.31666667 | 1 |   |   | MRCNS |  |
| 394 |   |   | bl | sep | Staphylococcus epidermidis   | CoNS+  | 0 | 45.81666667 | 2 |   |   | MSCNS |  |
| 395 |   |   | bl | sep | Staphylococcus epidermidis   | CoNS+  | 0 | 39.41666667 | 2 |   |   | MRCNS |  |
| 396 | m | 8 | bl | sgc | Streptococcus agalactiae     |        | 1 | 17.71666667 | 1 |   |   |       |  |
| 397 |   |   | bl | sho | Staphylococcus hominis       | CoNS++ | 0 | 31.83333333 | 2 |   |   | MRCNS |  |
| 398 |   |   | bl | sep | Staphylococcus epidermidis   | CoNS+  | 0 | 49.33333333 | 3 |   |   | MRCNS |  |

|     |   |    |    |     |                             |        |   |             |   |  |   |       |  |
|-----|---|----|----|-----|-----------------------------|--------|---|-------------|---|--|---|-------|--|
| 399 |   |    | bl | sep | Staphylococcus epidermidis  | CoNS+  | 0 | 34.1        | 2 |  |   | MRCNS |  |
| 400 | m | 1  | bl | sgc | Streptococcus agalactiae    |        | 1 | 22.31666667 | 1 |  |   |       |  |
| 401 |   |    | bl | efm | Enterococcus faecium        |        | 0 | 40.2        | 2 |  |   |       |  |
| 402 |   |    | bl | sca | Staphylococcus capitis      | CoNS+  | 0 | 16.55       | 1 |  |   | MRCNS |  |
| 403 |   |    | bl | sep | Staphylococcus epidermidis  | CoNS+  | 0 | 34.66666667 | 2 |  |   | MSCNS |  |
| 404 |   |    | bl | sep | Staphylococcus epidermidis  | CoNS++ | 0 | 41.61666666 | 2 |  |   | MRCNS |  |
| 405 |   |    | bl | shl | Staphylococcus haemolyticus | CoNS+  | 0 | 64          | 3 |  |   | MRCNS |  |
| 406 |   |    | bl | sca | Staphylococcus capitis      | CoNS+  | 0 | 60.83333333 | 3 |  |   | MSCNS |  |
| 407 | m | 2  | bl | sal | Salmonella                  |        | 1 | 36.65       | 2 |  |   |       |  |
| 408 |   |    | bl | sep | Staphylococcus epidermidis  | CoNS++ | 0 | 49.13333333 | 3 |  |   | MRCNS |  |
| 409 |   |    | bl | sho | Staphylococcus hominis      | CoNS++ | 0 | 27.78333333 | 2 |  |   | MRCNS |  |
| 410 |   |    | bl | sho | Staphylococcus hominis      | CoNS+  | 0 | 44.18333333 | 2 |  |   | MRCNS |  |
| 411 |   |    | bl | sep | Staphylococcus epidermidis  | CoNS++ | 0 | 36.36666667 | 2 |  |   | MRCNS |  |
| 412 |   |    | bl | sle | Staphylococcus sciuri       | CoNS++ | 0 | 36.46666667 | 2 |  |   | MRCNS |  |
| 413 | f | 2  | bl | efa | Enterococcus faecalis       |        | 1 | 23.98333333 | 1 |  |   |       |  |
| 414 |   |    | bl | sho | Staphylococcus hominis      | CoNS+  | 0 | 57.15       | 3 |  |   | MRCNS |  |
| 415 | f | 10 | bl | sau | Staphylococcus aureus       |        | 1 | 20.4        | 1 |  |   | MSSA  |  |
| 416 |   |    | bl | sep | Staphylococcus epidermidis  | CoNS+  | 0 | 50.11666667 | 3 |  |   | MRCNS |  |
| 417 | f | 2  | bl | sep | Staphylococcus epidermidis  | CoNS+  | 1 | 21.35       | 1 |  |   | MRCNS |  |
| 418 |   |    | bl | sep | Staphylococcus epidermidis  | CoNS+  | 0 | 42.45       | 2 |  |   | MRCNS |  |
| 419 |   |    | bl | sho | Staphylococcus hominis      | CoNS+  | 0 | 26.96666667 | 2 |  |   | MRCNS |  |
| 420 |   |    | bl | sho | Staphylococcus hominis      | CoNS+  | 0 | 45.26666667 | 2 |  |   | MSCNS |  |
| 421 |   |    | bl | sep | Staphylococcus epidermidis  | CoNS+  | 0 | 34.15       | 2 |  |   | MRCNS |  |
| 422 |   |    | bl | shl | Staphylococcus haemolyticus | CoNS+  | 0 | 38.31666666 | 2 |  |   | MSCNS |  |
| 423 |   |    | bl | sep | Staphylococcus epidermidis  | CoNS+  | 0 | 43.36666667 | 2 |  |   | MRCNS |  |
| 424 |   |    | bl | shl | Staphylococcus haemolyticus | CoNS+  | 0 | 27.5        | 2 |  |   | MRCNS |  |
| 425 |   |    | bl | sho | Staphylococcus hominis      | CoNS+  | 0 | 40.58333333 | 2 |  |   | MRCNS |  |
| 426 |   |    | bl | sep | Staphylococcus epidermidis  | CoNS+  | 0 | 43.86666667 | 2 |  |   | MRCNS |  |
| 427 |   |    | bl | sep | Staphylococcus epidermidis  | CoNS+  | 0 | 36.45       | 2 |  |   | MRCNS |  |
| 428 |   |    | bl | sep | Staphylococcus epidermidis  | CoNS+  | 0 | 26.13333333 | 2 |  |   | MRCNS |  |
| 429 |   |    | bl | sho | Staphylococcus hominis      | CoNS++ | 0 | 20.36666667 | 1 |  |   | MRCNS |  |
| 430 | f | 1  | bl | pae | Pseudomonas aeruginosa      |        | 1 | 23.6        | 1 |  | + |       |  |
| 431 | f | 1  | bl | sgc | Streptococcus agalactiae    |        | 1 | 45.06666667 | 2 |  |   |       |  |
| 432 |   |    | bl | sep | Staphylococcus epidermidis  | CoNS+  | 0 | 36.01666667 | 2 |  |   | MRCNS |  |
| 433 |   |    | bl | sho | Staphylococcus hominis      | CoNS+  | 0 | 23.2        | 1 |  |   | MRCNS |  |
| 434 |   |    | bl | shl | Staphylococcus haemolyticus | CoNS+  | 0 | 37.48333333 | 2 |  |   | MRCNS |  |
| 435 |   |    | bl | sep | Staphylococcus epidermidis  | CoNS+  | 0 | 53.71666667 | 3 |  |   | MRCNS |  |
| 436 |   |    | bl | shl | Staphylococcus haemolyticus | CoNS+  | 0 | 50.13333333 | 3 |  |   | MRCNS |  |
| 437 |   |    | bl | sep | Staphylococcus epidermidis  | CoNS+  | 0 | 29.41666667 | 2 |  |   | MRCNS |  |
| 438 |   |    | bl | ssi | Staphylococcus simulans     | CoNS+  | 0 | 30.25       | 2 |  |   | MRCNS |  |

|     |   |    |    |     |                              |        |   |             |   |   |  |       |      |
|-----|---|----|----|-----|------------------------------|--------|---|-------------|---|---|--|-------|------|
| 439 |   |    | bl | shl | Staphylococcus haemolyticus  | CoNS+  | 0 | 35.15       | 2 |   |  | MRCNS |      |
| 440 | f | 6  | bl | sgc | Streptococcus agalactiae     |        | 1 | 15.68333334 | 1 |   |  |       |      |
| 441 |   |    | bl | sho | Staphylococcus hominis       | CoNS+  | 0 | 41.38333333 | 2 |   |  | MRCNS |      |
| 442 | m | 2  | bl | pae | Pseudomonas aeruginosa       |        | 1 | 19.21666667 | 1 |   |  |       |      |
| 443 | m | 10 | bl | sau | Staphylococcus aureus        |        | 1 | 16.5        | 1 |   |  | MSSA  |      |
| 444 |   |    | bl | shl | Staphylococcus haemolyticus  | CoNS+  | 0 | 51.68333334 | 3 |   |  | MRCNS |      |
| 445 | m | 2  | bl | sho | Staphylococcus hominis       | CoNS+  | 1 | 21.48333333 | 1 |   |  | MRCNS |      |
| 446 |   |    | bl | sho | Staphylococcus hominis       | CoNS+  | 0 | 25.55       | 2 |   |  | MRCNS |      |
| 447 |   |    | bl | sho | Staphylococcus hominis       | CoNS+  | 0 | 33.26666667 | 2 |   |  | MRCNS |      |
| 448 |   |    | bl | sep | Staphylococcus epidermidis   | CoNS++ | 0 | 40.1        | 2 |   |  | MRCNS |      |
| 449 |   |    | bl | sau | Staphylococcus aureus        |        | 0 | 46.56666666 | 2 |   |  | MSSA  |      |
| 450 |   |    | bl | sep | Staphylococcus epidermidis   | CoNS+  | 0 | 49.11666667 | 3 |   |  | MRCNS |      |
| 451 |   |    | bl | sho | Staphylococcus hominis       | CoNS+  | 0 | 33.5        | 2 |   |  | MRCNS |      |
| 452 | f | 2  | bl | pma | Stenotrophomonas maltophilia |        | 1 | 45.01666667 | 2 |   |  |       |      |
| 453 |   |    | bl | sep | Staphylococcus epidermidis   | CoNS+  | 0 | 44.76666666 | 2 |   |  | MRCNS |      |
| 454 | f | 1  | bl | sau | Staphylococcus aureus        |        | 1 | 19.6        | 1 |   |  | MRSA  |      |
| 455 |   |    | bl | shl | Staphylococcus haemolyticus  | CoNS+  | 0 | 28.61666667 | 2 |   |  | MRCNS |      |
| 456 |   |    | bl | sep | Staphylococcus epidermidis   | CoNS+  | 0 | 68.43333333 | 3 |   |  | MRCNS |      |
| 457 | m | 3  | bl | sho | Staphylococcus hominis       | CoNS+  | 1 | 18.51666667 | 1 |   |  | MRCNS |      |
| 458 | f | 1  | bl | sho | Staphylococcus hominis       | CoNS+  | 1 | 18.61666667 | 1 |   |  | MRCNS |      |
| 459 | f | 3  | bl | kpn | Klebsiella pneumoniae        |        | 1 | 12.05       | 1 | - |  |       |      |
| 460 | f | 5  | bl | pae | Pseudomonas aeruginosa       |        | 1 | 17.83333333 | 1 |   |  |       |      |
| 461 |   |    | bl | sep | Staphylococcus epidermidis   | CoNS+  | 0 | 24.43333333 | 2 |   |  | MRCNS |      |
| 462 | f | 1  | bl | eco | Escherichia coli             |        | 1 | 16.36666667 | 1 | - |  |       |      |
| 463 |   |    | bl | sep | Staphylococcus epidermidis   | CoNS+  | 0 | 56.95       | 3 |   |  | MRCNS |      |
| 464 | f | 2  | bl | spn | Streptococcus Pneumoniae     |        | 1 | 14.38333333 | 1 |   |  |       | PISP |
| 465 | m | 9  | bl | sau | Staphylococcus aureus        |        | 1 | 16.15       | 1 |   |  | MSSA  |      |
| 466 |   |    | bl | sho | Staphylococcus hominis       | CoNS+  | 0 | 46.35       | 2 |   |  | MRCNS |      |
| 467 | f | 1  | bl | eco | Escherichia coli             |        | 1 | 9.050000002 | 1 | - |  |       |      |
| 468 |   |    | bl | sho | Staphylococcus hominis       | CoNS++ | 0 | 41.01666666 | 2 |   |  | MRCNS |      |
| 469 | m | 2  | bl | efa | Enterococcus faecalis        |        | 1 | 16.11666666 | 1 |   |  |       |      |
| 470 |   |    | bl | sep | Staphylococcus epidermidis   | CoNS++ | 0 | 20.63333333 | 1 |   |  | MRCNS |      |
| 471 | m | 1  | bl | efa | Enterococcus faecalis        |        | 1 | 23.36666667 | 1 |   |  |       |      |
| 472 |   |    | bl | sep | Staphylococcus epidermidis   | CoNS+  | 0 | 23.65       | 1 |   |  | MRCNS |      |
| 473 |   |    | bl | sep | Staphylococcus epidermidis   | CoNS++ | 0 | 14.06666667 | 1 |   |  | MSCNS |      |
| 474 | f | 2  | bl | sgc | Streptococcus agalactiae     |        | 1 | 13.21666667 | 1 |   |  |       |      |
| 475 |   |    | bl | sep | Staphylococcus epidermidis   | CoNS+  | 0 | 51.55       | 3 |   |  | MRCNS |      |
| 476 |   |    | bl | sep | Staphylococcus epidermidis   | CoNS+  | 0 | 27.86666667 | 2 |   |  | MRCNS |      |
| 477 |   |    | bl | efm | Enterococcus faecium         |        | 0 | 44.65       | 2 |   |  |       |      |
| 478 | m | 1  | bl | pae | Pseudomonas aeruginosa       |        | 1 | 22.43333333 | 1 |   |  |       |      |

|     |   |   |    |     |                              |        |   |             |   |   |   |       |  |
|-----|---|---|----|-----|------------------------------|--------|---|-------------|---|---|---|-------|--|
| 479 |   |   | bl | sep | Staphylococcus epidermidis   | CoNS+  | 0 | 40.21666667 | 2 |   |   | MRCNS |  |
| 480 |   |   | bl | sep | Staphylococcus epidermidis   | CoNS+  | 0 | 40.53333333 | 2 |   |   | MRCNS |  |
| 481 |   |   | bl | sep | Staphylococcus epidermidis   | CoNS+  | 0 | 59.16666667 | 3 |   |   | MRCNS |  |
| 482 |   |   | bl | sho | Staphylococcus hominis       | CoNS+  | 0 | 36.9        | 2 |   |   | MRCNS |  |
| 483 |   |   | bl | sho | Staphylococcus hominis       | CoNS+  | 0 | 26.3        | 2 |   |   | MRCNS |  |
| 484 | m | 1 | bl | pae | Pseudomonas aeruginosa       |        | 1 | 23.3        | 1 |   |   |       |  |
| 485 |   |   | bl | sep | Staphylococcus epidermidis   | CoNS++ | 0 | 18.1        | 1 |   |   | MRCNS |  |
| 486 |   |   | bl | sep | Staphylococcus epidermidis   | CoNS++ | 0 | 56.41666667 | 3 |   |   | MRCNS |  |
| 487 |   |   | bl | sep | Staphylococcus epidermidis   | CoNS+  | 0 | 30.91666667 | 2 |   |   | MSCNS |  |
| 488 | m | 8 | bl | kpn | Klebsiella pneumoniae        |        | 1 | 12.96666667 | 1 | + | + |       |  |
| 489 |   |   | bl | scp | Staphylococcus caprae        | CoNS+  | 0 | 51.03333333 | 3 |   |   | MSCNS |  |
| 490 |   |   | bl | sep | Staphylococcus epidermidis   | CoNS+  | 0 | 57.23333333 | 3 |   |   | MRCNS |  |
| 491 | m | 1 | bl | eco | Escherichia coli             |        | 1 | 21.63333333 | 1 | - |   |       |  |
| 492 |   |   | bl | sep | Staphylococcus epidermidis   | CoNS+  | 0 | 52.81666667 | 3 |   |   | MRCNS |  |
| 493 |   |   | bl | shl | Staphylococcus haemolyticus  | CoNS+  | 0 | 44.58333333 | 2 |   |   | MRCNS |  |
| 494 |   |   | bl | sho | Staphylococcus hominis       | CoNS+  | 0 | 43.65       | 2 |   |   | MRCNS |  |
| 495 |   |   | bl | sho | Staphylococcus hominis       | CoNS+  | 0 | 30.33333333 | 2 |   |   | MRCNS |  |
| 496 |   |   | bl | pps | Staphylococcus saprophyticus | CoNS+  | 0 | 23.93333333 | 1 |   |   | MRCNS |  |
| 497 |   |   | bl | sho | Staphylococcus hominis       | CoNS+  | 0 | 40.9        | 2 |   |   | MSCNS |  |
| 498 |   |   | bl | sho | Staphylococcus hominis       | CoNS+  | 0 | 48.18333333 | 3 |   |   | MSCNS |  |
| 499 | f | 1 | bl | kpn | Klebsiella pneumoniae        |        | 1 | 17.4        | 1 | + |   |       |  |
| 500 |   |   | bl | mlu | Micrococcus luteus           |        | 0 | 44.45       | 2 |   |   |       |  |
| 501 |   |   | bl | sep | Staphylococcus epidermidis   | CoNS++ | 0 | 22.56666667 | 1 |   |   | MRCNS |  |
| 502 |   |   | bl | sho | Staphylococcus hominis       | CoNS++ | 0 | 27.06666667 | 2 |   |   | MSCNS |  |
| 503 |   |   | bl | sho | Staphylococcus hominis       | CoNS+  | 0 | 22.1        | 1 |   |   | MSCNS |  |
| 504 |   |   | bl | sho | Staphylococcus hominis       | CoNS+  | 0 | 22.43333333 | 1 |   |   | MRCNS |  |
| 505 | f | 2 | bl | kpn | Klebsiella pneumoniae        |        | 1 | 23.71666667 | 1 | + | + |       |  |
| 506 | f | 8 | bl | pae | Pseudomonas aeruginosa       |        | 1 | 15.06666667 | 1 |   |   |       |  |
| 507 |   |   | bl | sho | Staphylococcus hominis       | CoNS+  | 0 | 33.38333333 | 2 |   |   | MRCNS |  |
| 508 |   |   | bl | sho | Staphylococcus hominis       | CoNS+  | 0 | 33.7        | 2 |   |   | MRCNS |  |
| 509 | m | 3 | bl | sma | Serratia marcescens          |        | 1 | 7.8         | 1 |   |   |       |  |
| 510 |   |   | bl | sep | Staphylococcus epidermidis   | CoNS+  | 0 | 36.86666667 | 2 |   |   | MRCNS |  |
| 511 | f | 2 | bl | kpn | Klebsiella pneumoniae        |        | 1 | 10.66666667 | 1 | + |   |       |  |
| 512 |   |   | bl | pps | Staphylococcus saprophyticus | CoNS++ | 0 | 49.28333333 | 3 |   |   | MRCNS |  |
| 513 | m | 9 | bl | sal | Salmonella                   |        | 1 | 14.08333333 | 1 |   |   |       |  |
| 514 |   |   | bl | sep | Staphylococcus epidermidis   | CoNS+  | 0 | 47.1        | 2 |   |   | MRCNS |  |
| 515 | f | 1 | bl | sgc | Streptococcus agalactiae     |        | 1 | 25.08333333 | 2 |   |   |       |  |
| 516 | f | 2 | bl | sho | Staphylococcus hominis       | CoNS+  | 1 | 21.85       | 1 |   |   | MSCNS |  |
| 517 | f | 2 | bl | kpn | Klebsiella pneumoniae        |        | 1 | 7.266666665 | 1 | + |   |       |  |
| 518 |   |   | bl | sep | Staphylococcus epidermidis   | CoNS+  | 0 | 62.71666667 | 3 |   |   | MRCNS |  |

|     |   |   |    |     |                              |        |   |             |   |   |   |       |  |
|-----|---|---|----|-----|------------------------------|--------|---|-------------|---|---|---|-------|--|
| 519 | f | 2 | bl | sep | Staphylococcus epidermidis   | CoNS+  | 1 | 18.6        | 1 |   |   | MRCNS |  |
| 520 |   |   | bl | sle | Staphylococcus sciuri        | CoNS+  | 0 | 30.73333333 | 2 |   |   | MRCNS |  |
| 521 |   |   | bl | sep | Staphylococcus epidermidis   | CoNS+  | 0 | 30.83333333 | 2 |   |   | MRCNS |  |
| 522 |   |   | bl | sho | Staphylococcus hominis       | CoNS+  | 0 | 36.51666666 | 2 |   |   | MSCNS |  |
| 523 |   |   | bl | sep | Staphylococcus epidermidis   | CoNS+  | 0 | 53.93333333 | 3 |   |   | MRCNS |  |
| 524 |   |   | bl | sho | Staphylococcus hominis       | CoNS+  | 0 | 46.96666667 | 2 |   |   | MSCNS |  |
| 525 |   |   | bl | sho | Staphylococcus hominis       | CoNS+  | 0 | 29.25       | 2 |   |   | MSCNS |  |
| 526 |   |   | bl | sho | Staphylococcus hominis       | CoNS+  | 0 | 34.43333333 | 2 |   |   | MSCNS |  |
| 527 |   |   | bl | sca | Staphylococcus capitis       | CoNS+  | 0 | 53.4        | 3 |   |   | MRCNS |  |
| 528 |   |   | bl | shl | Staphylococcus haemolyticus  | CoNS+  | 0 | 20.43333333 | 1 |   |   | MSCNS |  |
| 529 |   |   | bl | sca | Staphylococcus capitis       | CoNS++ | 0 | 42.03333333 | 2 |   |   | MRCNS |  |
| 530 |   |   | bl | shl | Staphylococcus haemolyticus  | CoNS+  | 0 | 26.01666667 | 2 |   |   | MRCNS |  |
| 531 |   |   | bl | sho | Staphylococcus hominis       | CoNS++ | 0 | 30.2        | 2 |   |   | MSCNS |  |
| 532 |   |   | bl | sho | Staphylococcus hominis       | CoNS+  | 0 | 57.23333333 | 3 |   |   | MSCNS |  |
| 533 |   |   | bl | sho | Staphylococcus hominis       | CoNS+  | 0 | 22.7        | 1 |   |   | MRCNS |  |
| 534 |   |   | bl | sep | Staphylococcus epidermidis   | CoNS+  | 0 | 48.46666667 | 3 |   |   | MRCNS |  |
| 535 | f | 1 | bl | kpn | Klebsiella pneumoniae        |        | 1 | 10.51666667 | 1 | + | + |       |  |
| 536 | f | 7 | bl | sau | Staphylococcus aureus        |        | 1 | 15.9        | 1 |   |   | MRSA  |  |
| 537 |   |   | bl | sep | Staphylococcus epidermidis   | CoNS+  | 0 | 17.53333333 | 1 |   |   | MRCNS |  |
| 538 |   |   | bl | sep | Staphylococcus epidermidis   | CoNS++ | 0 | 35.78333334 | 2 |   |   | MRCNS |  |
| 539 |   |   | bl | shl | Staphylococcus haemolyticus  | CoNS++ | 0 | 32.3        | 2 |   |   | MRCNS |  |
| 540 |   |   | bl | sho | Staphylococcus hominis       | CoNS+  | 0 | 23.8        | 1 |   |   | MRCNS |  |
| 541 |   |   | bl | ssi | Staphylococcus simulans      | CoNS++ | 0 | 21.25       | 1 |   |   | MSCNS |  |
| 542 | f | 1 | bl | eco | Escherichia coli             |        | 1 | 18.03333333 | 1 | + |   |       |  |
| 543 |   |   | bl | pps | Staphylococcus saprophyticus | CoNS+  | 0 | 24.55       | 2 |   |   | MRCNS |  |
| 544 |   |   | bl | sca | Staphylococcus capitis       | CoNS+  | 0 | 41.28333333 | 2 |   |   | MSCNS |  |
| 545 |   |   | bl | sep | Staphylococcus epidermidis   | CoNS+  | 0 | 35.5        | 2 |   |   | MRCNS |  |
| 546 |   |   | bl | sep | Staphylococcus epidermidis   | CoNS+  | 0 | 40.08333333 | 2 |   |   | MRCNS |  |
| 547 | f | 1 | bl | sgc | Streptococcus agalactiae     |        | 1 | 14.93333333 | 1 |   |   |       |  |
| 548 | f | 4 | bl | scp | Staphylococcus caprae        | CoNS+  | 1 | 16.98333333 | 1 |   |   | MSCNS |  |
| 549 |   |   | bl | sep | Staphylococcus epidermidis   | CoNS+  | 0 | 33.01666667 | 2 |   |   | MSCNS |  |
| 550 |   |   | bl | sho | Staphylococcus hominis       | CoNS+  | 0 | 49.13333333 | 3 |   |   | MRCNS |  |
| 551 | f | 1 | bl | efm | Enterococcus faecium         |        | 1 | 25.88333333 | 2 |   |   |       |  |
| 552 |   |   | bl | sep | Staphylococcus epidermidis   | CoNS+  | 0 | 92.73333333 | 4 |   |   | MRCNS |  |
| 553 |   |   | bl | sho | Staphylococcus hominis       | CoNS+  | 0 | 31.73333334 | 2 |   |   | MRCNS |  |
| 554 |   |   | bl | sho | Staphylococcus hominis       | CoNS+  | 0 | 40.56666667 | 2 |   |   | MRCNS |  |
| 555 | m | 3 | bl | sma | Serratia marcescens          |        | 1 | 13.41666667 | 1 |   |   |       |  |
| 556 |   |   | bl | sca | Staphylococcus capitis       | CoNS+  | 0 | 65.28333333 | 3 |   |   | MRCNS |  |
| 557 |   |   | bl | sep | Staphylococcus epidermidis   | CoNS++ | 0 | 31.25       | 2 |   |   | MRCNS |  |
| 558 |   |   | bl | sho | Staphylococcus hominis       | CoNS+  | 0 | 32.18333333 | 2 |   |   | MRCNS |  |

|     |   |   |    |     |                             |        |   |             |   |     |  |       |      |
|-----|---|---|----|-----|-----------------------------|--------|---|-------------|---|-----|--|-------|------|
| 559 | m | 2 | bl | sal | Salmonella                  |        | 1 | 9.733333335 | 1 |     |  |       |      |
| 560 |   |   | bl | sep | Staphylococcus epidermidis  | CoNS+  | 0 | 34.91666667 | 2 |     |  | MRCNS |      |
| 561 | m | 2 | bl | aba | Acinetobacter baumannii     |        | 1 | 14.93333333 | 1 | XDR |  |       |      |
| 562 |   |   | bl | sep | Staphylococcus epidermidis  | CoNS+  | 0 | 34.45       | 2 |     |  | MRCNS |      |
| 563 |   |   | bl | shl | Staphylococcus haemolyticus | CoNS+  | 0 | 29.01666667 | 2 |     |  | MRCNS |      |
| 564 |   |   | bl | sho | Staphylococcus hominis      | CoNS+  | 0 | 36.06666667 | 2 |     |  | MSCNS |      |
| 565 |   |   | bl | sep | Staphylococcus epidermidis  | CoNS+  | 0 | 52.6        | 3 |     |  | MRCNS |      |
| 566 | m | 1 | bl | sgc | Streptococcus agalactiae    |        | 1 | 11.93333333 | 1 |     |  |       |      |
| 567 |   |   | bl | sep | Staphylococcus epidermidis  | CoNS+  | 0 | 29.48333333 | 2 |     |  | MRCNS |      |
| 568 | m | 4 | bl | sho | Staphylococcus hominis      | CoNS+  | 1 | 21.95       | 1 |     |  | MRCNS |      |
| 569 |   |   | bl | efm | Enterococcus faecium        |        | 0 | 34.46666667 | 2 |     |  |       |      |
| 570 |   |   | bl | sep | Staphylococcus epidermidis  | CoNS+  | 0 | 33.95       | 2 |     |  | MRCNS |      |
| 571 |   |   | bl | sho | Staphylococcus hominis      | CoNS+  | 0 | 26.4        | 2 |     |  | MSCNS |      |
| 572 | m | 1 | bl | efa | Enterococcus faecalis       |        | 1 | 17.71666667 | 1 |     |  |       |      |
| 573 | m | 2 | bl | kpn | Klebsiella pneumoniae       |        | 1 | 31.45       | 2 | +   |  |       |      |
| 574 |   |   | bl | sep | Staphylococcus epidermidis  | CoNS+  | 0 | 30.01666667 | 2 |     |  | MRCNS |      |
| 575 |   |   | bl | sho | Staphylococcus hominis      | CoNS++ | 0 | 52.63333333 | 3 |     |  | MRCNS |      |
| 576 |   |   | bl | shl | Staphylococcus haemolyticus | CoNS+  | 0 | 48.93333333 | 3 |     |  | MRCNS |      |
| 577 | m | 8 | bl | spn | Streptococcus Pneumoniae    |        | 1 | 22.2        | 1 |     |  |       | PSSP |
| 578 | m | 1 | bl | shl | Staphylococcus haemolyticus | CoNS+  | 1 | 17.18333334 | 1 |     |  | MRCNS |      |
| 579 |   |   | bl | ssi | Staphylococcus simulans     | CoNS+  | 0 | 27.55       | 2 |     |  | MRCNS |      |
| 580 |   |   | bl | swa | Staphylococcus warneri      | CoNS+  | 0 | 30.6        | 2 |     |  | MRCNS |      |
| 581 | m | 2 | bl | kpn | Klebsiella pneumoniae       |        | 1 | 23.18333333 | 1 | -   |  |       |      |
| 582 |   |   | bl | sep | Staphylococcus epidermidis  | CoNS+  | 0 | 41.65       | 2 |     |  | MRCNS |      |
| 583 |   |   | bl | sho | Staphylococcus hominis      | CoNS+  | 0 | 24.21666667 | 2 |     |  | MRCNS |      |
| 584 |   |   | bl | sho | Staphylococcus hominis      | CoNS+  | 0 | 28.46666667 | 2 |     |  | MRCNS |      |
| 585 | f | 2 | bl | kpn | Klebsiella pneumoniae       |        | 1 | 15.66666667 | 1 | +   |  |       |      |
| 586 |   |   | bl | sep | Staphylococcus epidermidis  | CoNS++ | 0 | 24.58333333 | 2 |     |  | MRCNS |      |
| 587 |   |   | bl | shl | Staphylococcus haemolyticus | CoNS++ | 0 | 24.98333333 | 2 |     |  | MRCNS |      |
| 588 | m | 1 | bl | spn | Streptococcus Pneumoniae    |        | 1 | 15.71666667 | 1 |     |  |       | PSSP |
| 589 |   |   | bl | ssi | Staphylococcus simulans     | CoNS++ | 0 | 30.15       | 2 |     |  | MRCNS |      |
| 590 | m | 1 | bl | eco | Escherichia coli            |        | 1 | 11.43333333 | 1 | -   |  |       |      |
| 591 | f | 2 | bl | efa | Enterococcus faecalis       |        | 1 | 10.71666667 | 1 |     |  |       |      |
| 592 |   |   | bl | sep | Staphylococcus epidermidis  | CoNS+  | 0 | 59.6        | 3 |     |  | MSCNS |      |
| 593 |   |   | bl | sep | Staphylococcus epidermidis  | CoNS+  | 0 | 62.96666667 | 3 |     |  | MSCNS |      |
| 594 | m | 2 | bl | sho | Staphylococcus hominis      | CoNS+  | 1 | 16.35       | 1 |     |  | MRCNS |      |
| 595 | m | 2 | bl | kpn | Klebsiella pneumoniae       |        | 1 | 8.966666666 | 1 | +   |  |       |      |
| 596 |   |   | bl | sep | Staphylococcus epidermidis  | CoNS+  | 0 | 60.13333333 | 3 |     |  | MRCNS |      |
| 597 | f | 2 | bl | sho | Staphylococcus hominis      | CoNS+  | 1 | 16.15       | 1 |     |  | MRCNS |      |
| 598 |   |   | bl | sho | Staphylococcus hominis      | CoNS+  | 0 | 57          | 3 |     |  | MRCNS |      |

|     |   |    |    |     |                             |        |   |             |   |   |   |       |      |
|-----|---|----|----|-----|-----------------------------|--------|---|-------------|---|---|---|-------|------|
| 599 | f | 2  | bl | kpn | Klebsiella pneumoniae       |        | 1 | 10.13333333 | 1 | + |   |       |      |
| 600 | f | 3  | bl | spn | Streptococcus Pneumoniae    |        | 1 | 21.63333333 | 1 |   |   |       | PSSP |
| 601 |   |    | bl | sca | Staphylococcus capitis      | CoNS+  | 0 | 77.51666667 | 4 |   |   | MRCNS |      |
| 602 |   |    | bl | sho | Staphylococcus hominis      | CoNS+  | 0 | 35.81666667 | 2 |   |   | MRCNS |      |
| 603 | f | 2  | bl | kpn | Klebsiella pneumoniae       |        | 1 | 10.26666667 | 1 | + | + |       |      |
| 604 |   |    | bl | sep | Staphylococcus epidermidis  | CoNS+  | 0 | 58.66666667 | 3 |   |   | MRCNS |      |
| 605 |   |    | bl | sep | Staphylococcus epidermidis  | CoNS+  | 0 | 27.03333333 | 2 |   |   | MRCNS |      |
| 606 |   |    | bl | sep | Staphylococcus epidermidis  | CoNS+  | 0 | 44.11666667 | 2 |   |   | MSCNS |      |
| 607 |   |    | bl | shl | Staphylococcus haemolyticus | CoNS+  | 0 | 31.41666667 | 2 |   |   | MRCNS |      |
| 608 |   |    | bl | sho | Staphylococcus hominis      | CoNS+  | 0 | 32.81666667 | 2 |   |   | MSCNS |      |
| 609 |   |    | bl | swa | Staphylococcus warneri      | CoNS+  | 0 | 40          | 2 |   |   | MRCNS |      |
| 610 |   |    | bl | sep | Staphylococcus epidermidis  | CoNS+  | 0 | 57.38333334 | 3 |   |   | MSCNS |      |
| 611 |   |    | bl | sep | Staphylococcus epidermidis  | CoNS++ | 0 | 70.21666667 | 3 |   |   | MSCNS |      |
| 612 |   |    | bl | sep | Staphylococcus epidermidis  | CoNS+  | 0 | 41.1        | 2 |   |   | MRCNS |      |
| 613 |   |    | bl | sep | Staphylococcus epidermidis  | CoNS+  | 0 | 49.01666667 | 3 |   |   | MRCNS |      |
| 614 |   |    | bl | shl | Staphylococcus haemolyticus | CoNS+  | 0 | 33.33333333 | 2 |   |   | MSCNS |      |
| 615 |   |    | bl | sho | Staphylococcus hominis      | CoNS+  | 0 | 50.48333333 | 3 |   |   | MRCNS |      |
| 616 | m | 14 | bl | efa | Enterococcus faecalis       |        | 1 | 31.56666666 | 2 |   |   |       |      |
| 617 |   |    | bl | sep | Staphylococcus epidermidis  | CoNS++ | 0 | 48.23333333 | 3 |   |   | MRCNS |      |
| 618 |   |    | bl | shl | Staphylococcus haemolyticus | CoNS++ | 0 | 32.86666667 | 2 |   |   | MRCNS |      |
| 619 |   |    | bl | sho | Staphylococcus hominis      | CoNS+  | 0 | 31.76666667 | 2 |   |   | MRCNS |      |
| 620 | m | 1  | bl | kpn | Klebsiella pneumoniae       |        | 1 | 19.26666667 | 1 | + | + |       |      |
| 621 | m | 12 | bl | sau | Staphylococcus aureus       |        | 1 | 14.2        | 1 |   |   | MRSA  |      |
| 622 |   |    | bl | sep | Staphylococcus epidermidis  | CoNS++ | 0 | 28.51666667 | 2 |   |   | MRCNS |      |
| 623 |   |    | bl | shl | Staphylococcus haemolyticus | CoNS++ | 0 | 25.51666667 | 2 |   |   | MRCNS |      |
| 624 |   |    | bl | sho | Staphylococcus hominis      | CoNS+  | 0 | 30.08333333 | 2 |   |   | MRCNS |      |
| 625 |   |    | bl | sep | Staphylococcus epidermidis  | CoNS+  | 0 | 28.15       | 2 |   |   | MRCNS |      |
| 626 |   |    | bl | sho | Staphylococcus hominis      | CoNS+  | 0 | 36.4        | 2 |   |   | MSCNS |      |
| 627 | f | 1  | bl | sgc | Streptococcus agalactiae    |        | 1 | 29.98333333 | 2 |   |   |       |      |
| 628 |   |    | bl | shl | Staphylococcus haemolyticus | CoNS+  | 0 | 34.81666667 | 2 |   |   | MRCNS |      |
| 629 |   |    | bl | sho | Staphylococcus hominis      | CoNS+  | 0 | 25.73333334 | 2 |   |   | MRCNS |      |
| 630 |   |    | bl | sho | Staphylococcus hominis      | CoNS+  | 0 | 25.26666667 | 2 |   |   | MRCNS |      |
| 631 |   |    | bl | sle | Staphylococcus sciuri       | CoNS+  | 0 | 32.43333333 | 2 |   |   | MRCNS |      |
| 632 |   |    | bl | sho | Staphylococcus hominis      | CoNS+  | 0 | 25.56666667 | 2 |   |   | MRCNS |      |
| 633 |   |    | bl | sho | Staphylococcus hominis      | CoNS+  | 0 | 26.58333333 | 2 |   |   | MSCNS |      |
| 634 |   |    | bl | sep | Staphylococcus epidermidis  | CoNS+  | 0 | 45.01666667 | 2 |   |   | MSCNS |      |
| 635 | m | 1  | bl | efm | Enterococcus faecium        |        | 1 | 24.68333333 | 2 |   |   |       |      |
| 636 |   |    | bl | sep | Staphylococcus epidermidis  | CoNS+  | 0 | 81.68333334 | 4 |   |   | MRCNS |      |
| 637 |   |    | bl | sho | Staphylococcus hominis      | CoNS++ | 0 | 38.78333333 | 2 |   |   | MRCNS |      |
| 638 |   |    | bl | sho | Staphylococcus hominis      | CoNS+  | 0 | 30.06666666 | 2 |   |   | MRCNS |      |



|     |   |    |    |     |                              |        |   |             |   |   |   |       |      |
|-----|---|----|----|-----|------------------------------|--------|---|-------------|---|---|---|-------|------|
| 639 | m | 2  | bl | efa | Enterococcus faecalis        |        | 1 | 24.06666667 | 2 |   |   |       |      |
| 640 | m | 14 | bl | sau | Staphylococcus aureus        |        | 1 | 14.96666667 | 1 |   |   | MSSA  |      |
| 641 |   |    | bl | sep | Staphylococcus epidermidis   | CoNS+  | 0 | 62.8        | 3 |   |   | MRCNS |      |
| 642 |   |    | bl | sho | Staphylococcus hominis       | CoNS+  | 0 | 27.66666667 | 2 |   |   | MRCNS |      |
| 643 |   |    | bl | shl | Staphylococcus haemolyticus  | CoNS+  | 0 | 43.11666666 | 2 |   |   | MRCNS |      |
| 644 |   |    | bl | sho | Staphylococcus hominis       | CoNS++ | 0 | 24.31666667 | 2 |   |   | MRCNS |      |
| 645 |   |    | bl | sle | Staphylococcus sciuri        | CoNS++ | 0 | 20.76666666 | 1 |   |   | MRCNS |      |
| 646 |   |    | bl | sho | Staphylococcus hominis       | CoNS+  | 0 | 29.66666667 | 2 |   |   | MSCNS |      |
| 647 | f | 2  | bl | kpn | Klebsiella pneumoniae        |        | 1 | 9.233333333 | 1 | + |   |       |      |
| 648 |   |    | bl | sho | Staphylococcus hominis       | CoNS+  | 0 | 43.18333333 | 2 |   |   | MRCNS |      |
| 649 | m | 1  | bl | efm | Enterococcus faecium         |        | 1 | 27.36666667 | 2 |   |   |       |      |
| 650 |   |    | bl | sep | Staphylococcus epidermidis   | CoNS+  | 0 | 29.46666667 | 2 |   |   | MSCNS |      |
| 651 |   |    | bl | sep | Staphylococcus epidermidis   | CoNS++ | 0 | 26.7        | 2 |   |   | MRCNS |      |
| 652 | m | 7  | bl | hin | Haemophilus influenzae       |        | 1 | 18.1        | 1 |   |   |       |      |
| 653 |   |    | bl | sep | Staphylococcus epidermidis   | CoNS+  | 0 | 48.88333333 | 3 |   |   | MSCNS |      |
| 654 |   |    | bl | sep | Staphylococcus epidermidis   | CoNS+  | 0 | 72.76666667 | 4 |   |   | MRCNS |      |
| 655 | m | 1  | bl | sep | Staphylococcus epidermidis   | CoNS+  | 1 | 14.6        | 1 |   |   | MRCNS |      |
| 656 | m | 2  | bl | eco | Escherichia coli             |        | 1 | 10.8        | 1 | + |   |       |      |
| 657 | m | 1  | bl | sau | Staphylococcus aureus        |        | 1 | 12.3        | 1 |   |   | MRSA  |      |
| 658 |   |    | bl | sho | Staphylococcus hominis       | CoNS+  | 0 | 50.28333333 | 3 |   |   | MSCNS |      |
| 659 |   |    | bl | sho | Staphylococcus hominis       | CoNS+  | 0 | 23.28333333 | 1 |   |   | MRCNS |      |
| 660 | m | 6  | bl | pma | Stenotrophomonas maltophilia |        | 1 | 12.01666667 | 1 |   |   |       |      |
| 661 | m | 2  | bl | sgc | Streptococcus agalactiae     |        | 1 | 13.13333333 | 1 |   |   |       |      |
| 662 | m | 3  | bl | spn | Streptococcus Pneumoniae     |        | 1 | 11.43333333 | 1 |   |   |       | PSSP |
| 663 |   |    | bl | sca | Staphylococcus capitis       | CoNS+  | 0 | 44.2        | 2 |   |   | MRCNS |      |
| 664 |   |    | bl | shl | Staphylococcus haemolyticus  | CoNS+  | 0 | 33.96666667 | 2 |   |   | MRCNS |      |
| 665 | f | 2  | bl | eco | Escherichia coli             |        | 1 | 17.85       | 1 | + |   |       |      |
| 666 | f | 14 | bl | efm | Enterococcus faecium         |        | 1 | 23.48333333 | 1 |   |   |       |      |
| 667 |   |    | bl | sep | Staphylococcus epidermidis   | CoNS+  | 0 | 64.23333333 | 3 |   |   | MRCNS |      |
| 668 | f | 2  | bl | sep | Staphylococcus epidermidis   | CoNS+  | 1 | 19.36666667 | 1 |   |   | MRCNS |      |
| 669 |   |    | bl | sho | Staphylococcus hominis       | CoNS+  | 0 | 51.01666667 | 3 |   |   | MRCNS |      |
| 670 | f | 2  | bl | efa | Enterococcus faecalis        |        | 1 | 14.36666667 | 1 |   |   |       |      |
| 671 |   |    | bl | sho | Staphylococcus hominis       | CoNS+  | 0 | 33.2        | 2 |   |   | MRCNS |      |
| 672 | m | 7  | bl | kpn | Klebsiella pneumoniae        |        | 1 | 7.716666667 | 1 | + |   |       |      |
| 673 |   |    | bl | shl | Staphylococcus haemolyticus  | CoNS+  | 0 | 24.88333333 | 2 |   |   | MRCNS |      |
| 674 | f | 3  | bl | spn | Streptococcus Pneumoniae     |        | 1 | 12.73333333 | 1 |   |   |       | PSSP |
| 675 | m | 4  | bl | kpn | Klebsiella pneumoniae        |        | 1 | 12.75       | 1 | + | + |       |      |
| 676 |   |    | bl | sca | Staphylococcus capitis       | CoNS+  | 0 | 35.36666667 | 2 |   |   | MSCNS |      |
| 677 |   |    | bl | sep | Staphylococcus epidermidis   | CoNS++ | 0 | 23.6        | 1 |   |   | MRCNS |      |
| 678 |   |    | bl | sho | Staphylococcus hominis       | CoNS+  | 0 | 39.56666667 | 2 |   |   | MRCNS |      |

|     |   |    |    |     |                              |        |   |             |   |   |   |       |      |
|-----|---|----|----|-----|------------------------------|--------|---|-------------|---|---|---|-------|------|
| 679 |   |    | bl | sho | Staphylococcus hominis       | CoNS+  | 0 | 40.63333333 | 2 |   |   | MRCNS |      |
| 680 |   |    | bl | sho | Staphylococcus hominis       | CoNS+  | 0 | 71.48333334 | 3 |   |   | MRCNS |      |
| 681 |   |    | bl | sep | Staphylococcus epidermidis   | CoNS++ | 0 | 28          | 2 |   |   | MSCNS |      |
| 682 |   |    | bl | efm | Enterococcus faecium         |        | 0 | 44.93333333 | 2 |   |   |       |      |
| 683 |   |    | bl | pps | Staphylococcus saprophyticus | CoNS+  | 0 | 44.21666667 | 2 |   |   | MRCNS |      |
| 684 |   |    | bl | sep | Staphylococcus epidermidis   | CoNS++ | 0 | 25.26666667 | 2 |   |   | MSCNS |      |
| 685 |   |    | bl | sep | Staphylococcus epidermidis   | CoNS+  | 0 | 38.81666667 | 2 |   |   | MRCNS |      |
| 686 |   |    | bl | sep | Staphylococcus epidermidis   | CoNS+  | 0 | 51.35       | 3 |   |   | MRCNS |      |
| 687 |   |    | bl | sep | Staphylococcus epidermidis   | CoNS+  | 0 | 50.36666667 | 3 |   |   | MRCNS |      |
| 688 |   |    | bl | sho | Staphylococcus hominis       | CoNS+  | 0 | 37.93333333 | 2 |   |   | MRCNS |      |
| 689 |   |    | bl | sho | Staphylococcus hominis       | CoNS+  | 0 | 39.2        | 2 |   |   | MRCNS |      |
| 690 | m | 2  | bl | kpn | Klebsiella pneumoniae        |        | 1 | 15.33333333 | 1 | - |   |       |      |
| 691 |   |    | bl | spn | Streptococcus Pneumoniae     |        | 0 | 36.85       | 2 |   |   |       | PSSP |
| 692 | m | 7  | bl | spn | Streptococcus Pneumoniae     |        | 1 | 28.63333333 | 2 |   |   |       | PSSP |
| 693 |   |    | bl | efa | Enterococcus faecalis        |        | 0 | 34.75       | 2 |   |   |       |      |
| 694 | m | 1  | bl | sgc | Streptococcus agalactiae     |        | 1 | 4.283333333 | 1 |   |   |       |      |
| 695 | m | 2  | bl | kpn | Klebsiella pneumoniae        |        | 1 | 12.63333333 | 1 | + |   |       |      |
| 696 | m | 2  | bl | kpn | Klebsiella pneumoniae        |        | 1 | 9.199999999 | 1 | + |   |       |      |
| 697 | m | 12 | bl | pae | Pseudomonas aeruginosa       |        | 1 | 5.766666667 | 1 |   | + |       |      |
| 698 |   |    | bl | sau | Staphylococcus aureus        |        | 0 | 33.71666667 | 2 |   |   | MSSA  |      |
| 699 | m | 5  | bl | sal | Salmonella                   |        | 1 | 19.4        | 1 |   |   |       |      |
| 700 | m | 1  | bl | kpn | Klebsiella pneumoniae        |        | 1 | 9.3         | 1 | - |   |       |      |
| 701 |   |    | bl | sau | Staphylococcus aureus        |        | 0 | 34.68333333 | 2 |   |   | MSSA  |      |
| 702 | m | 2  | bl | kpn | Klebsiella pneumoniae        |        | 1 | 37.65       | 2 | - |   |       |      |
| 703 | m | 2  | bl | kpn | Klebsiella pneumoniae        |        | 1 | 13.95       | 1 | - |   |       |      |
| 704 | f | 1  | bl | eco | Escherichia coli             |        | 1 | 9.866666667 | 1 | - |   |       |      |
| 705 | f | 2  | bl | pae | Pseudomonas aeruginosa       |        | 1 | 20.73333333 | 1 |   |   |       |      |
| 706 | f | 3  | bl | kpn | Klebsiella pneumoniae        |        | 1 | 10.63333333 | 1 |   |   |       |      |
| 707 | f | 1  | bl | sma | Serratia marcescens          |        | 1 | 13          | 1 |   |   |       |      |
| 708 | f | 4  | bl | sma | Serratia marcescens          |        | 1 | 17.7        | 1 |   |   |       |      |
| 709 | f | 1  | bl | kpn | Klebsiella pneumoniae        |        | 1 | 29.06666667 | 2 |   |   |       |      |
| 710 | f | 10 | bl | sau | Staphylococcus aureus        |        | 1 | 23.73333333 | 1 |   |   | MSSA  |      |
| 711 | f | 1  | bl | sma | Serratia marcescens          |        | 1 | 68.63333333 | 3 |   |   |       |      |
| 712 | f | 2  | bl | kpn | Klebsiella pneumoniae        |        | 1 | 12.1        | 1 |   |   |       |      |
| 713 | f | 1  | bl | kpn | Klebsiella pneumoniae        |        | 1 | 19.05       | 1 |   |   |       |      |
| 714 | f | 4  | bl | spn | Streptococcus Pneumoniae     |        | 1 | 20.7        | 1 |   |   |       | PISP |
| 715 | m | 3  | bl |     | Achromobacter xylosoxidans   |        | 1 | 16.26666667 | 1 |   |   |       |      |
| 716 | m | 6  | bl | sgc | Streptococcus agalactiae     |        | 1 | 7.05        | 1 |   |   |       |      |
| 717 | f | 1  | bl | sgc | Streptococcus agalactiae     |        | 1 | 17          | 1 |   |   |       |      |
| 718 | m | 5  | bl | sgc | Streptococcus agalactiae     |        | 1 | 20.75       | 1 |   |   |       |      |

|     |   |    |    |     |                                  |   |             |   |         |  |      |      |
|-----|---|----|----|-----|----------------------------------|---|-------------|---|---------|--|------|------|
| 719 | m | 1  | bl | spn | Streptococcus Pneumoniae         | 1 | 14.88333333 | 1 |         |  |      | PSSP |
| 720 | f | 4  | bl | spn | Streptococcus Pneumoniae         | 1 | 10.43333333 | 1 |         |  |      | PSSP |
| 721 | f | 7  | bl |     | Streptococcus sanguis            | 1 | 24.93333333 | 2 |         |  |      |      |
| 722 | f | 1  | bl | sgc | Streptococcus agalactiae         | 1 | 15.93333333 | 1 |         |  |      |      |
| 723 | f | 9  | bl | sgc | Streptococcus agalactiae         | 1 | 7.333333332 | 1 |         |  |      |      |
| 724 | m | 5  | bl | sgc | Streptococcus agalactiae         | 1 | 15.45       | 1 |         |  |      |      |
| 725 | m | 13 | bl | sgc | Streptococcus agalactiae         | 1 | 14.41666667 | 1 |         |  |      |      |
| 726 | f | 12 | bl | sgc | Streptococcus agalactiae         | 1 | 19.83333333 | 1 |         |  |      |      |
| 727 | m | 3  | bl | spn | Streptococcus Pneumoniae         | 1 | 16.05       | 1 |         |  |      | PSSP |
| 728 | f | 11 | bl | pma | Stenotrophomonas maltophilia     | 1 | 14.85       | 1 |         |  |      |      |
| 729 | f | 14 | bl | sau | Staphylococcus aureus            | 1 | 14.21666667 | 1 |         |  | MRSA |      |
| 730 | f | 13 | bl | kpn | Klebsiella pneumoniae            | 1 | 8.266666666 | 1 | +       |  |      |      |
| 731 |   |    | bl |     | Elizabethkingia menin-gosepticum | 0 | 26.15       | 2 |         |  |      |      |
| 732 | f | 12 | bl | pma | Stenotrophomonas maltophilia     | 1 | 18.65       | 1 |         |  |      |      |
| 733 | m | 1  | bl | kpn | Klebsiella pneumoniae            | 1 | 13.83333333 | 1 |         |  |      |      |
| 734 | m | 1  | bl | aba | Acinetobacter baumannii          | 1 | 16.36666667 | 1 | NON-XDR |  |      |      |
| 735 | f | 5  | bl | efa | Enterococcus faecalis            | 1 | 16.96666667 | 1 |         |  |      |      |
| 736 | f | 6  | bl | kpn | Klebsiella pneumoniae            | 1 | 17.45       | 1 | -       |  |      |      |
| 737 | m | 4  | bl | kpn | Klebsiella pneumoniae            | 1 | 24          | 1 | +       |  |      |      |
| 738 | m | 2  | bl | kpn | Klebsiella pneumoniae            | 1 | 13.2        | 1 | +       |  |      |      |
| 739 | f | 1  | bl | aba | Acinetobacter baumannii          | 1 | 40.23333333 | 2 | NON-XDR |  |      |      |
| 740 | m | 2  | bl | efm | Enterococcus faecium             | 1 | 24.51666667 | 2 |         |  |      |      |
| 741 | m | 3  | bl | sal | Salmonella                       | 1 | 32.38333333 | 2 |         |  |      |      |
| 742 | m | 4  | bl | kpn | Klebsiella pneumoniae            | 1 | 13.28333333 | 1 | -       |  |      |      |
| 743 | f | 4  | bl | pae | Pseudomonas aeruginosa           | 1 | 27.05       | 2 |         |  |      |      |
| 744 | m | 5  | bl | sal | Salmonella                       | 1 | 12.91666667 | 1 |         |  |      |      |
| 745 | m | 5  | bl | sma | Serratia marcescens              | 1 | 12.1        | 1 |         |  |      |      |
| 746 | m | 5  | bl | sma | Serratia marcescens              | 1 | 16.58333333 | 1 |         |  |      |      |
| 747 | f | 5  | bl | aba | Acinetobacter baumannii          | 1 | 19.58333333 | 1 | XDR     |  |      |      |
| 748 | m | 3  | bl | sal | Salmonella                       | 1 | 9.233333333 | 1 |         |  |      |      |
| 749 | f | 5  | bl | efa | Enterococcus faecalis            | 1 | 14.8        | 1 |         |  |      |      |
| 750 | f | 5  | bl | sau | Staphylococcus aureus            | 1 | 19.03333333 | 1 |         |  | MRSA |      |
| 751 | m | 1  | bl | sau | Staphylococcus aureus            | 1 | 14.96666667 | 1 |         |  | MRSA |      |
| 752 | f | 3  | bl | hin | Haemophilus influenzae           | 1 | 14.93333333 | 1 |         |  |      |      |
| 753 | m | 7  | bl | kpn | Klebsiella pneumoniae            | 1 | 12.9        | 1 | +       |  |      |      |
| 754 | m | 2  | bl | eco | Escherichia coli                 | 1 | 11.48333333 | 1 | +       |  |      |      |
| 755 | m | 5  | bl | pae | Pseudomonas aeruginosa           | 1 | 23.91666666 | 1 |         |  |      |      |
| 756 | f | 5  | bl | efa | Enterococcus faecalis            | 1 | 15.53333333 | 1 |         |  |      |      |
| 757 | m | 1  | bl | sau | Staphylococcus aureus            | 1 | 25.31666667 | 2 |         |  | MSSA |      |
| 758 |   |    | bl | sau | Staphylococcus aureus            | 0 | 34.88333334 | 2 |         |  | MSSA |      |

|     |   |    |    |     |                         |   |             |   |     |  |      |  |
|-----|---|----|----|-----|-------------------------|---|-------------|---|-----|--|------|--|
| 759 | f | 5  | bl | eco | Escherichia coli        | 1 | 16.43333334 | 1 | +   |  |      |  |
| 760 | f | 8  | bl | aba | Acinetobacter baumannii | 1 | 9.799999999 | 1 | XDR |  |      |  |
| 761 | f | 1  | bl | eco | Escherichia coli        | 1 | 15.55       | 1 | +   |  |      |  |
| 762 | m | 10 | bl | kpn | Klebsiella pneumoniae   | 1 | 25.48333333 | 2 | +   |  |      |  |
| 763 | m | 1  | bl | kpn | Klebsiella pneumoniae   | 1 | 14.88333333 | 1 | -   |  |      |  |
| 764 | m | 3  | bl | sau | Staphylococcus aureus   | 1 | 36          | 2 |     |  | MSSA |  |
| 765 | f | 2  | bl | sau | Staphylococcus aureus   | 1 | 15.06666667 | 1 |     |  | MRSA |  |
| 766 |   |    | bl | efm | Enterococcus faecium    | 0 | 44.6        | 2 |     |  |      |  |
| 767 | f | 1  | bl | kpn | Klebsiella pneumoniae   | 1 | 22.35       | 1 | +   |  |      |  |
| 768 | m | 2  | bl | eco | Escherichia coli        | 1 | 11.85       | 1 | +   |  |      |  |
| 769 |   |    | bl |     | Bacillus cereus         | 0 | 24.95       | 2 |     |  |      |  |
| 770 |   |    | bl |     | Gram-positive bacilli   | 0 | 63.65       | 3 |     |  |      |  |
| 771 |   |    | bl |     | Bacillus cereus         | 0 | 14.75       | 1 |     |  |      |  |
| 772 |   |    | bl |     | Bacillus cereus         | 0 | 13.75       | 1 |     |  |      |  |
| 773 |   |    | bl | mlu | Micrococcus luteus      | 0 | 44.45       | 2 |     |  |      |  |
| 774 |   |    | bl | mlu | Micrococcus luteus      | 0 | 33.63333333 | 2 |     |  |      |  |
| 775 |   |    | bl |     | Bacillus                | 0 | 21.68333333 | 1 |     |  |      |  |
| 776 |   |    | bl |     | Gram-positive bacilli   | 0 | 53.96666667 | 3 |     |  |      |  |
| 777 |   |    | bl |     | Bacillus cereus         | 0 | 12.76666667 | 1 |     |  |      |  |
| 778 |   |    | bl |     | Bacillus cereus         | 0 | 22.81666667 | 1 |     |  |      |  |
| 779 |   |    | bl |     | Bacillus                | 0 | 28.58333333 | 2 |     |  |      |  |
| 780 |   |    | bl |     | Gram-positive bacilli   | 0 | 28.15       | 2 |     |  |      |  |
| 781 |   |    | bl |     | Bacillus cereus         | 0 | 18.2        | 1 |     |  |      |  |
| 782 | m | 13 | bl | cal | Candida albicans        | 1 | 34.33333333 | 2 |     |  |      |  |
| 783 | m | 13 | bl | cal | Candida albicans        | 1 | 33.13333333 | 2 |     |  |      |  |
| 784 | m | 3  | bl | cal | Candida albicans        | 1 | 14.1        | 1 |     |  |      |  |
| 785 | f | 7  | bl |     | Candida parapsilosis    | 1 | 53.96666667 | 3 |     |  |      |  |
| 786 | f | 1  | bl |     | Candida parapsilosis    | 1 | 82.25       | 4 |     |  |      |  |
| 787 | m | 7  | bl |     | Candida parapsilosis    | 1 | 46.56666667 | 2 |     |  |      |  |
| 788 | f | 7  | bl | cal | Candida albicans        | 1 | 62.4        | 3 |     |  |      |  |
| 789 | m | 2  | bl | cal | Candida albicans        | 1 | 31.31666667 | 2 |     |  |      |  |
| 790 | m | 2  | bl | cal | Candida albicans        | 1 | 30.63333333 | 2 |     |  |      |  |
| 791 | m | 1  | bl |     | Candida parapsilosis    | 1 | 26.53333333 | 2 |     |  |      |  |
| 792 | f | 1  | bl |     | Candida parapsilosis    | 1 | 24.55       | 2 |     |  |      |  |
| 793 | m | 2  | bl | cal | Candida albicans        | 1 | 33.75       | 2 |     |  |      |  |
| 794 | m | 2  | bl | cal | Candida albicans        | 1 | 35.75       | 2 |     |  |      |  |
| 795 | f | 2  | bl | cal | Candida albicans        | 1 | 34.86666667 | 2 |     |  |      |  |
| 796 | f | 2  | bl | cal | Candida albicans        | 1 | 32.03333333 | 2 |     |  |      |  |
| 797 | f | 4  | bl |     | Candida glabrata        | 1 | 31.13333334 | 2 |     |  |      |  |
| 798 | f | 13 | bl |     | Candida parapsilosis    | 1 | 16.88333333 | 1 |     |  |      |  |

|     |   |    |    |     |                      |  |   |             |   |  |  |  |  |
|-----|---|----|----|-----|----------------------|--|---|-------------|---|--|--|--|--|
| 799 | m | 13 | bl |     | Candida glabrata     |  | 1 | 67.21666667 | 3 |  |  |  |  |
| 800 | m | 1  | bl |     | Candida parapsilosis |  | 1 | 32.8        | 2 |  |  |  |  |
| 801 | m | 1  | bl |     | Candida parapsilosis |  | 1 | 30.13333333 | 2 |  |  |  |  |
| 802 | f | 1  | bl |     | Candida parapsilosis |  | 1 | 32.78333333 | 2 |  |  |  |  |
| 803 | m | 4  | bl |     | Candida parapsilosis |  | 1 | 34.28333333 | 2 |  |  |  |  |
| 804 | m | 5  | bl | cal | Candida albicans     |  | 1 | 27.33333333 | 2 |  |  |  |  |
| 805 | f | 7  | bl |     | Candida parapsilosis |  | 1 | 30.7        | 2 |  |  |  |  |
| 806 | f | 9  | bl |     | Candida parapsilosis |  | 1 | 24.7        | 2 |  |  |  |  |
| 807 | f | 2  | bl | cal | Candida albicans     |  | 1 | 27.65       | 2 |  |  |  |  |
| 808 | m | 1  | bl |     | Candida parapsilosis |  | 1 | 31.46666667 | 2 |  |  |  |  |
